# Supplementary material for: Development of an NLR-ID Toolkit and Identification of Novel Disease-Resistance Genes in Soybean
Source: MDPI journal article supplement (doi:10.3390/plants13050668), 2024-02-28
Supplement: s1 [file s1]

**Table S1** Sequence information of 210 TNL-like proteins.

| Number | Gene ID         | Length (aa) | Primary accession | Type |
|--------|-----------------|-------------|-------------------|------|
| 1      | GLYMA_01G032400 | 1453 aa     | K7K1I4            | TNLX |
| 2      | GLYMA_01G032900 | 956 aa      | K7K1J3            | TNL  |
| 3      | GLYMA_01G033200 | 1417 aa     | A0A0R0LCQ5        | TNL  |
| 4      | GLYMA_01G033300 | 1201 aa     | A0A0R0L5W8        | TNL  |
| 5      | GLYMA_01G039000 | 1379 aa     | I1J5H4            | TNL  |
| 6      | GLYMA_01G046900 | 1036 aa     | A0A0R0L6J4        | TNL  |
| 7      | GLYMA_01G112200 | 1227 aa     | K7K360            | TNLX |
| 8      | GLYMA_01G112300 | 1258 aa     | K7K361            | TNL  |
| 9      | GLYMA_01G119800 | 175 aa      | K7K3C5            | T    |
| 10     | GLYMA_01G125300 | 1063 aa     | K7K3H1            | TNL  |
| 11     | GLYMA_01G125400 | 1156 aa     | K7K3H2            | TNL  |
| 12     | GLYMA_01G220900 | 999 aa      | K7K584            | T    |
| 13     | GLYMA_02G023600 | 169 aa      | A0A0R0KQA9        | T    |
| 14     | GLYMA_02G023700 | 263 aa      | K7K612            | T    |
| 15     | GLYMA_02G023800 | 257 aa      | C6ZS34            | T    |
| 16     | GLYMA_02G023900 | 263 aa      | C6ZS33            | T    |
| 17     | GLYMA_02G024000 | 257 aa      | C6THX9            | TX   |
| 18     | GLYMA_02G033000 | 787 aa      | A0A0R0KY80        | TNL  |
| 19     | GLYMA_02G041800 | 784 aa      | K7K6E2            | TNX  |
| 20     | GLYMA_02G077000 | 426 aa      | A0A0R0LOH1        | TNX  |
| 21     | GLYMA_02G193400 | 427 aa      | K7K9I6            | T    |
| 22     | GLYMA_02G222500 | 745 aa      | A0A0R0KZP3        | TNLX |
| 23     | GLYMA_02G268900 | 1177 aa     | K7KB13            | TNL  |
| 24     | GLYMA_02G284000 | 101 aa      | K7KBB1            | T    |
| 25     | GLYMA_02G284100 | 1548 aa     | K7KBB2            | TNL  |
| 26     | GLYMA_02G284200 | 1683 aa     | A0A0R0L2V4        | TNL  |
| 27     | GLYMA_02G290300 | 380 aa      | I1JJ81            | TTX  |
| 28     | GLYMA_02G290400 | 375 aa      | C6TIX3            | TTX  |
| 29     | GLYMA_03G047700 | 829 aa      | A0A0R0KP92        | TNLX |
| 30     | GLYMA_03G047900 | 1049 aa     | A0A0R0KES8        | TNL  |
| 31     | GLYMA_03G048500 | 1012 aa     | A0A0R0KET5        | TNL  |
| 32     | GLYMA_03G048700 | 531aa       | A0A0R0KEW1        | TN   |
| 33     | GLYMA_03G048800 | 185 aa      | K7KCX0            | T    |
| 34     | GLYMA_03G052800 | 1444 aa     | K7KCZ9            | TNLX |
| 35     | GLYMA_03G053300 | 191 aa      | K7KD03            | T    |
| 36     | GLYMA_03G053500 | 758 aa      | A0A0R0KF26        | TN   |
| 37     | GLYMA_03G054100 | 887 aa      | A0A0R0KLY1        | TNL  |
| 38     | GLYMA_03G054600 | 316 aa      | A0A0R0KFL6        | TX   |
| 39     | GLYMA_03G075300 | 1128 aa     | K7KDI2            | TNL  |
| 40     | GLYMA_03G077400 | 1127 aa     | K7KDG9            | TNLX |
| 41     | GLYMA_03G087500 | 1084 aa     | I1JM77            | TNLX |
| 42     | GLYMA_03G087600 | 772 aa      | A0A0R0KGG0        | TNL  |

(continued table)

| Number | Gene ID         | Length (aa) | Primary accession | Type  |
|--------|-----------------|-------------|-------------------|-------|
| 43     | GLYMA_03G088000 | 905 aa      | K7KDW3            | TNL   |
| 44     | GLYMA_03G088100 | 1081 aa     | K7KDW5            | TNL   |
| 45     | GLYMA_04G219600 | 464 aa      | A0A0R0KB65        | TNL   |
| 46     | GLYMA_05G165800 | 1355 aa     | K7KQM9            | TNLX  |
| 47     | GLYMA_06G146200 | 222 aa      | K7KV37            | TX    |
| 48     | GLYMA_06G205100 | 397 aa      | A0A0R0JJM6        | TN    |
| 49     | GLYMA_06G216900 | 112 aa      | A0A0R0JKE6        | T     |
| 50     | GLYMA_06G248700 | 204 aa      | I1KDX9            | T     |
| 51     | GLYMA_06G256000 | 1158 aa     | A0A0R0JTT7        | TNL   |
| 52     | GLYMA_06G256100 | 180 aa      | K7KXC7            | T     |
| 53     | GLYMA_06G259100 | 1091 aa     | I1KE91            | TNL   |
| 54     | GLYMA_06G259400 | 1099 aa     | I1KE93            | TNL   |
| 55     | GLYMA_06G259800 | 1202 aa     | A0A0R0JLQ6        | TNL   |
| 56     | GLYMA_06G260100 | 1098 aa     | I1KE99            | TNL   |
| 57     | GLYMA_06G260500 | 572 aa      | A0A0R0JLQ8        | TL    |
| 58     | GLYMA_06G261400 | 1523 aa     | A0A0R0JT19        | XTNL  |
| 59     | GLYMA_06G261500 | 1110 aa     | I1KEB4            | TNLX  |
| 60     | GLYMA_06G263500 | 1143 aa     | K7KXJ1            | TNL   |
| 61     | GLYMA_06G263700 | 380 aa      | K7KXJ4            | TT    |
| 62     | GLYMA_06G263900 | 1322 aa     | A0A0R0JM06        | TNL   |
| 63     | GLYMA_06G264100 | 336 aa      | A0A0R0JXY0        | TT    |
| 64     | GLYMA_06G264300 | 522 aa      | A0A0R0JLW9        | TNX   |
| 65     | GLYMA_06G265000 | 1310 aa     | A0A0R0JS96        | TNL   |
| 66     | GLYMA_06G265200 | 266 aa      | K7KXK7            | TT    |
| 67     | GLYMA_06G265400 | 1296 aa     | A0A0R0JM20        | TNLX  |
| 68     | GLYMA_06G267300 | 636 aa      | Q8H6S7            | TNX   |
| 69     | GLYMA_06G267400 | 1238 aa     | K7KXM9            | TNTT  |
| 70     | GLYMA_06G268500 | 412 aa      | A0A0R0JT99        | TTX   |
| 71     | GLYMA_06G268600 | 641 aa      | I1KEG1            | TNX   |
| 72     | GLYMA_06G268700 | 1387 aa     | A0A0R0JM07        | TTTNL |
| 73     | GLYMA_06G285500 | 1084 aa     | I1KEV5            | TNL   |
| 74     | GLYMA_06G310000 | 1464 aa     | K7KYE4            | TNLX  |
| 75     | GLYMA_07G007900 | 110 aa      | A0A0R0J4I4        | T     |
| 76     | GLYMA_07G037000 | 1090 aa     | K7KZI3            | TNLX  |
| 77     | GLYMA_07G067900 | 905 aa      | A0A0R0J6E0        | TNL   |
| 78     | GLYMA_07G123000 | 1171 aa     | K7L0Z9            | TNL   |
| 79     | GLYMA_07G193000 | 185 aa      | I1KLG4            | T     |
| 80     | GLYMA_08G159200 | 125 aa      | A0A0R0IMV1        | T     |
| 81     | GLYMA_08G192900 | 1137 aa     | K7L7M1            | TNL   |
| 82     | GLYMA_08G293600 | 1430 aa     | K7L9P4            | TNL   |
| 83     | GLYMA_08G295000 | 265 aa      | K7L9Q3            | T     |
| 84     | GLYMA_08G295100 | 150 aa      | A0A0R0J0J4        | T     |

(continued table)

| Number | Gene ID         | Length (aa) | Primary accession | Type  |
|--------|-----------------|-------------|-------------------|-------|
| 85     | GLYMA_08G295400 | 128 aa      | A0A0R0J042        | TX    |
| 86     | GLYMA_08G301200 | 1231 aa     | K7L9U4            | TNLX  |
| 87     | GLYMA_08G303600 | 362 aa      | K7L9W1            | TN    |
| 88     | GLYMA_08G303700 | 882 aa      | K7L9W3            | TNL   |
| 89     | GLYMA_09G056400 | 1072 aa     | I1L1A5            | TNLD  |
| 90     | GLYMA_09G056500 | 67 aa       | K7LBZ9            | T     |
| 91     | GLYMA_09G057000 | 1036 aa     | K7LC01            | TNL   |
| 92     | GLYMA_09G075500 | 1055 aa     | A0A0R0IEZ9        | TNL   |
| 93     | GLYMA_09G134400 | 441 aa      | A0A0R0IDT0        | TLT   |
| 94     | GLYMA_09G161400 | 1390 aa     | K7LE88            | TNXLD |
| 95     | GLYMA_09G164800 | 459 aa      | A0A0R0IFK2        | TND   |
| 96     | GLYMA_09G202800 | 1008 aa     | A0A0R0IAY8        | TNL   |
| 97     | GLYMA_10G184300 | 1220 aa     | A0A0R0HV98        | TNL   |
| 98     | GLYMA_10G184400 | 1030 aa     | A0A0R0HVF4        | TNX   |
| 99     | GLYMA_11G022700 | 1008 aa     | K7LMN0            | T     |
| 100    | GLYMA_11G153000 | 1085 aa     | K7LQJ9            | TNL   |
| 101    | GLYMA_11G160500 | 636 aa      | K7KPR3            | TTNL  |
| 102    | GLYMA_12G027100 | 1163 aa     | K7LSQ4            | TNL   |
| 103    | GLYMA_12G132000 | 1076 aa     | K7LU16            | TNL   |
| 104    | GLYMA_12G132200 | 1087 aa     | K7LUI7            | TNL   |
| 105    | GLYMA_12G132400 | 411 aa      | A0A0R0H572        | TN    |
| 106    | GLYMA_12G133000 | 620 aa      | K7LUJ2            | TL    |
| 107    | GLYMA_12G135600 | 1141 aa     | I1LSM9            | TNL   |
| 108    | GLYMA_12G137900 | 902 aa      | A0A0R0HDM9        | TNL   |
| 109    | GLYMA_12G138400 | 685 aa      | A0A0R0HEA3        | TNL   |
| 110    | GLYMA_12G138500 | 234 aa      | A0A0R0H5P2        | TND   |
| 111    | GLYMA_12G163000 | 522 aa      | A0A0R0HG01        | TNL   |
| 112    | GLYMA_12G212500 | 1190 aa     | K7LW75            | TNL   |
| 113    | GLYMA_12G221600 | 200 aa      | I1LUY0            | T     |
| 114    | GLYMA_12G239200 | 919 aa      | K7LWN3            | TNL   |
| 115    | GLYMA_12G239700 | 1481 aa     | K7LWN5            | TNL   |
| 116    | GLYMA_12G239800 | 1368 aa     | A0A0R0HAA3        | TNL   |
| 117    | GLYMA_12G240100 | 1014 aa     | K7LWN7            | TNL   |
| 118    | GLYMA_13G028100 | 1036 aa     | K7LYT2            | TNL   |
| 119    | GLYMA_13G076200 | 979 aa      | I1LWA0            | TNL   |
| 120    | GLYMA_13G078200 | 576 aa      | A0A0R0GJV2        | TNL   |
| 121    | GLYMA_13G194700 | 1095 aa     | I1M0P9            | TNL   |
| 122    | GLYMA_13G194800 | 490 aa      | I1M0Q0            | TND   |
| 123    | GLYMA_13G194900 | 530 aa      | I1M0S0            | TNX   |
| 124    | GLYMA_13G195100 | 1095 aa     | A0A0R0GQV9        | TNL   |
| 125    | GLYMA_13G242900 | 106 aa      | K7M1M8            | T     |
| 126    | GLYMA_13G243000 | 193 aa      | I1M289            | T     |

(continued table)

| Number | Gene ID         | Length (aa) | Primary accession | Type |
|--------|-----------------|-------------|-------------------|------|
| 127    | GLYMA_13G279700 | 200 aa      | A0A0R0GW30        | T    |
| 128    | GLYMA_14G024400 | 337 aa      | C6ZS32            | TT   |
| 129    | GLYMA_14G024500 | 370 aa      | A0A0R4J566        | TT   |
| 130    | GLYMA_14G048600 | 1127 aa     | K7M4Z6            | TNL  |
| 131    | GLYMA_14G151100 | 1167 aa     | K7M6W8            | TNL  |
| 132    | GLYMA_14G152600 | 128 aa      | A0A0R0GKC9        | T    |
| 133    | GLYMA_15G024800 | 1158 aa     | I1MD01            | TNL  |
| 134    | GLYMA_15G070400 | 182 aa      | I1MEE1            | T    |
| 135    | GLYMA_15G070500 | 181 aa      | K7MA27            | T    |
| 136    | GLYMA_15G152200 | 1161 aa     | A0A0R0G1P5        | TNLX |
| 137    | GLYMA_15G152300 | 87 aa       | A0A0R0G9S6        | T    |
| 138    | GLYMA_15G152400 | 1149 aa     | A0A0R0G9U0        | TNL  |
| 139    | GLYMA_15G160900 | 1106 aa     | K7MBP2            | TNL  |
| 140    | GLYMA_15G162700 | 929 aa      | A0A0R0G1P9        | TNL  |
| 141    | GLYMA_15G232400 | 498 aa      | K7MDC7            | TND  |
| 142    | GLYMA_15G232600 | 494 aa      | A0A0R0G4X0        | TN   |
| 143    | GLYMA_15G232700 | 522 aa      | K7MDD3            | TN   |
| 144    | GLYMA_16G006400 | 1054 aa     | K7MEG0            | TNLX |
| 145    | GLYMA_16G033900 | 1162 aa     | A0A0R0FKV4        | TNL  |
| 146    | GLYMA_16G085400 | 981 aa      | A0A0R0FN48        | TNL  |
| 147    | GLYMA_16G085700 | 1059 aa     | I1MM77            | TNLX |
| 148    | GLYMA_16G085900 | 1113 aa     | I1MM78            | TNL  |
| 149    | GLYMA_16G086500 | 987 aa      | K7MG05            | TNL  |
| 150    | GLYMA_16G086700 | 1036 aa     | A0A0R0FN84        | TNL  |
| 151    | GLYMA_16G087100 | 1041 aa     | K7MG09            | TNLX |
| 152    | GLYMA_16G118600 | 797 aa      | I1MMX8            | TN   |
| 153    | GLYMA_16G127900 | 1422 aa     | A0A0R0G1J4        | TNLX |
| 154    | GLYMA_16G128000 | 997 aa      | A0A0R0FQ34        | TNL  |
| 155    | GLYMA_16G135200 | 1058 aa     | K7MH68            | TNL  |
| 156    | GLYMA_16G135500 | 1047 aa     | I1MNC5            | TNL  |
| 157    | GLYMA_16G135900 | 376 aa      | I1MNC7            | TNX  |
| 158    | GLYMA_16G136000 | 1055 aa     | A0A0R0FQC6        | TNL  |
| 159    | GLYMA_16G136200 | 956 aa      | A0A0R0FQD0        | TNL  |
| 160    | GLYMA_16G136600 | 1403 aa     | K7MH77            | TNL  |
| 161    | GLYMA_16G136900 | 907 aa      | A0A0R0FQD6        | TNL  |
| 162    | GLYMA_16G137200 | 423 aa      | I1MND4            | TN   |
| 163    | GLYMA_16G137300 | 1029 aa     | I1MND5            | TNL  |
| 164    | GLYMA_16G137600 | 1079 aa     | A0A0R0FZ27        | TNL  |
| 165    | GLYMA_16G147000 | 709 aa      | A0A0R0G2F8        | TNL  |
| 166    | GLYMA_16G147400 | 732 aa      | A0A0R0FZL1        | TNL  |
| 167    | GLYMA_16G159100 | 1149 aa     | K7MHM2            | TNL  |
| 168    | GLYMA_16G159200 | 272 aa      | A0A0R0G0Q0        | TN   |



(continued table)

| Number | Gene ID         | Length (aa) | Primary accession | Type |
|--------|-----------------|-------------|-------------------|------|
| 169    | GLYMA_16G159400 | 176 aa      | K7MHM5            | T    |
| 170    | GLYMA_16G159600 | 1079 aa     | A0A0R0G1Y1        | TNL  |
| 171    | GLYMA_16G159700 | 1040 aa     | K7MHM7            | TNL  |
| 172    | GLYMA_16G198900 | 1087 aa     | A0A0R0FT41        | TNL  |
| 173    | GLYMA_16G209000 | 164 aa      | A0A0R0G203        | T    |
| 174    | GLYMA_16G210600 | 1420 aa     | I1MQE7            | TNLX |
| 175    | GLYMA_16G210800 | 1432 aa     | K7MIT8            | TNLX |
| 176    | GLYMA_16G211400 | 1288 aa     | A0A0R0G194        | TNL  |
| 177    | GLYMA_16G212300 | 1051 aa     | D6PT14            | TNL  |
| 178    | GLYMA_16G213700 | 1088 aa     | A0A0R0FTG2        | TNL  |
| 179    | GLYMA_16G213800 | 1098 aa     | A0A0R0FTF9        | TNL  |
| 180    | GLYMA_16G213900 | 1097 aa     | A0A0R0FTC3        | TNL  |
| 181    | GLYMA_16G214000 | 966 aa      | A0A0R0FT79        | TNL  |
| 182    | GLYMA_16G214100 | 1103 aa     | I1MQI3            | TNL  |
| 183    | GLYMA_16G214200 | 641 aa      | Q84ZU9            | TNX  |
| 184    | GLYMA_16G214300 | 670 aa      | A0A0R0FTY7        | TNX  |
| 185    | GLYMA_16G214500 | 264 aa      | Q84ZV1            | TX   |
| 186    | GLYMA_16G214600 | 1044 aa     | A0A0R0FTH7        | TNL  |
| 187    | GLYMA_16G214700 | 77 aa       | Q84ZV4            | T    |
| 188    | GLYMA_16G214800 | 305 aa      | K7MIY3            | TX   |
| 189    | GLYMA_16G214900 | 923 aa      | A0A0R0FTD8        | TNL  |
| 190    | GLYMA_16G215000 | 1105 aa     | A0A0R0G4T7        | TNL  |
| 191    | GLYMA_16G215100 | 353 aa      | K7MIY7            | TN   |
| 192    | GLYMA_16G215200 | 68 aa       | K7MIY8            | T    |
| 193    | GLYMA_16G215400 | 393 aa      | K7MIZ0            | TN   |
| 194    | GLYMA_17G197100 | 211 aa      | K7MMQ0            | T    |
| 195    | GLYMA_18G127800 | 136 aa      | A0A0R0F079        | T    |
| 196    | GLYMA_18G127900 | 299 aa      | C6ZS22            | T    |
| 197    | GLYMA_18G128000 | 171 aa      | K7MRQ4            | T    |
| 198    | GLYMA_19G022700 | 1073 aa     | I1N650            | TNL  |
| 199    | GLYMA_19G054700 | 1080 aa     | I1N6X6            | TNL  |
| 200    | GLYMA_19G054800 | 723 aa      | A0A0R0EJF1        | TNL  |
| 201    | GLYMA_19G054900 | 1124 aa     | K7MWR8            | TNL  |
| 202    | GLYMA_19G055000 | 1119 aa     | K7MWR9            | TNL  |
| 203    | GLYMA_20G020200 | 1344 aa     | K7N0U7            | TNL  |
| 204    | GLYMA_20G020500 | 214 aa      | A0A0R0E5K4        | T    |
| 205    | GLYMA_20G048800 | 1114 aa     | A0A0R0E807        | TNL  |
| 206    | GLYMA_20G061300 | 1033 aa     | K7N1C6            | TNL  |
| 207    | GLYMA_U005000   | 199 aa      | K7KCX9            | T    |
| 208    | GLYMA_U008300   | 1070 aa     | A0A0R0E307        | TNL  |
| 209    | GLYMA_U035400   | 825 aa      | A0A0R0EE48        | TNL  |
| 210    | GLYMA_U035700   | 1043 aa     | A0A0R0E2U1        | TNL  |

**Table S2** Soybean *Gm-TNL-ID* genes information.

| Gene names         | Gene ID         | Gene Description                          | Integrated domain |
|--------------------|-----------------|-------------------------------------------|-------------------|
| <i>Gm-TNL-ID1</i>  | GLYMA_13G194700 | TMV resistance protein N like             | DUF4571           |
| <i>Gm-TNL-ID2</i>  | GLYMA_06G265000 | disease resistance protein RPV1 like      | DUF4277           |
| <i>Gm-TNL-ID3</i>  | GLYMA_03G087500 |                                           | DUF2207           |
| <i>Gm-TNL-ID4</i>  | GLYMA_12G240100 | disease resistance protein RUN1 like      | AAA22             |
| <i>Gm-TNL-ID5</i>  | GLYMA_15G152400 |                                           | AAA22             |
| <i>Gm-TNL-ID6</i>  | GLYMA_06G265400 | LRR domain-containing protein             | DUF3760           |
| <i>Gm-TNL-ID7</i>  | GLYMA_16G087100 | disease resistance protein RUN1 like      | ATPase2           |
| <i>Gm-TNL-ID8</i>  | GLYMA_13G078200 |                                           | FBD               |
| <i>Gm-TNL-ID9</i>  | GLYMA_06G310000 | TMV resistance protein N like             | AnfG_VnfG         |
| <i>Gm-TNL-ID10</i> | GLYMA_09G056400 | disease resistance protein RPV1 like      | DUF3557           |
| <i>Gm-TNL-ID11</i> | GLYMA_16G210800 | candidate disease-resistance protein      | zf-RVT, RVT3      |
| <i>Gm-TNL-ID12</i> | GLYMA_16G127900 |                                           | zf-RVT, RVT3      |
| <i>Gm-TNL-ID13</i> | GLYMA_09G161400 | TMV resistance protein N like             | zf-RVT, RVT3      |
| <i>Gm-TNL-ID14</i> | GLYMA_16G210600 | TMV resistance protein N like             | zf-RVT, RVT3      |
| <i>Gm-TNL-ID15</i> | GLYMA_08G301200 | TMV resistance protein N like             | zf-RVT            |
| <i>Gm-TNL-ID16</i> | GLYMA_06G285500 | disease resistance protein RUN1 like      | Zinc_ribbon 13    |
| <i>Gm-TNL-ID17</i> | GLYMA_05G165800 |                                           | WRKY              |
| <i>Gm-TNL-ID18</i> | GLYMA_03G075300 | disease resistance protein RPV1 like      | RNA_helicase      |
| <i>Gm-TNL-ID19</i> | GLYMA_03G077400 | disease resistance protein RPV1 like      | NfeD              |
| <i>Gm-TNL-ID20</i> | GLYMA_07G123000 | disease resistance protein RPV1 like      | RICTOR_M          |
| <i>Gm-TNL-ID21</i> | GLYMA_16G085700 | disease resistance protein RUN1 like      | Pox_RNA_Pol_19    |
| <i>Gm-TNL-ID22</i> | GLYMA_03G047900 |                                           | Phage_rep_org_N   |
| <i>Gm-TNL-ID23</i> | GLYMA_16G006400 | disease resistance protein RPV1 like      | NTPase1           |
| <i>Gm-TNL-ID24</i> | GLYMA_07G037000 | disease resistance protein RPV1 lke       | NTPase1           |
| <i>Gm-TNL-ID25</i> | GLYMA_06G267300 | KR3 disease resistance protein KR3        | MotA_activ        |
| <i>Gm-TNL-ID26</i> | GLYMA_16G213700 |                                           | MotA_activ        |
| <i>Gm-TNL-ID27</i> | GLYMA_19G022700 | TMV resistance protein N like             | MotA_activ        |
| <i>Gm-TNL-ID28</i> | GLYMA_16G159600 |                                           | MotA_activ        |
| <i>Gm-TNL-ID29</i> | GLYMA_19G054900 | KR1 resistance protein KR1                | MotA_activ        |
| <i>Gm-TNL-ID30</i> | GLYMA_19G054700 | disease resistance protein RPV1 like      | MotA_activ        |
| <i>Gm-TNL-ID31</i> | GLYMA_16G147400 |                                           | MotA_activ        |
| <i>Gm-TNL-ID32</i> | GLYMA_16G137300 | disease resistance protein RUN1 like      | MotA_activ        |
| <i>Gm-TNL-ID33</i> | GLYMA_16G136000 |                                           | MotA_activ        |
| <i>Gm-TNL-ID34</i> | GLYMA_16G136200 |                                           | MotA_activ        |
| <i>Gm-TNL-ID35</i> | GLYMA_16G135500 | TMV resistance protein N ilke             | MotA_activ        |
| <i>Gm-TNL-ID36</i> | GLYMA_16G135200 | Disease resistance protein RUN1 like      | MotA_activ        |
| <i>Gm-TNL-ID37</i> | GLYMA_03G052800 | Disease resistance protein RUN1 like      | Hirudin           |
| <i>Gm-TNL-ID38</i> | GLYMA_01G032400 | TMV resistance protein N like             | HAUS_augmin3      |
| <i>Gm-TNL-ID39</i> | GLYMA_14G151100 | Disease resistance protein RPV1 like      | NACHT             |
| <i>Gm-TNL-ID40</i> | GLYMA_16G085400 |                                           | NACHT             |
| <i>Gm-TNL-ID41</i> | GLYMA_15G152200 | disease resistance-like protein DSC1 like | FNIP              |

**Table S3** Identification of proteins interacting with SRZ4.

| Gene ID         | Annotations                                                                                                |
|-----------------|------------------------------------------------------------------------------------------------------------|
| GLYMA_06G029400 | <i>Glycine max</i> 26S proteasome regulatory subunit 10B homolog A, mRNA                                   |
| GLYMA_11G021400 | <i>Glycine max</i> 2-C-methyl-D-erythritol 2,4-cyclodiphosphate synthase, chloroplastic-like               |
| GLYMA_10G078400 | <i>Glycine max</i> 2-cys peroxiredoxin, mRNA                                                               |
| GLYMA_20G082800 | <i>Glycine max</i> 31 kDa ribonucleoprotein, chloroplastic-like, mRNA                                      |
| GLYMA_11G078700 | <i>Glycine max</i> 3-dehydroquinate synthase, transcript variant X1, mRNA                                  |
| GLYMA_19G254600 | <i>Glycine max</i> anthocyanidin reductase, mRNA                                                           |
| GLYMA_08G036400 | <i>Glycine max</i> auxin-responsive protein IAA27-like , transcript variant X1, mRNA                       |
| GLYMA_04G082900 | <i>Glycine max</i> casein kinase 1-like protein 4                                                          |
| GLYMA_05G128000 | <i>Glycine max</i> chlorophyll a-b-binding protein (CAB3), mRNA                                            |
| GLYMA_09G154700 | <i>Glycine max</i> chlorophyll a-b binding protein CP26                                                    |
| GLYMA_06G194900 | <i>Glycine max</i> chlorophyll a-b binding protein P4, chloroplastic, mRNA                                 |
| GLYMA_05G059200 | <i>Glycine max</i> Cwf15/Cwc15 cell cycle control family protein, mRNA                                     |
| GLYMA_08G241600 | <i>Glycine max</i> cyclic nucleotide-gated ion channel 2, transcript variant X2, mRNA                      |
| GLYMA_11G113500 | <i>Glycine max</i> cysteine protease RD19A, mRNA                                                           |
| GLYMA_18G154900 | <i>Glycine max</i> cytochrome b5, mRNA                                                                     |
| GLYMA_11G213600 | <i>Glycine max</i> cytochrome c oxidase assembly protein COX11, mitochondrial-like, mRNA                   |
| GLYMA_13G237000 | <i>Glycine max</i> dormancy-associated protein 1-like, transcript variant 1, mRNA                          |
| GLYMA_11G110000 | <i>Glycine max</i> epimerase family protein slr1223-like, mRNA; nuclear gene for chloroplast product       |
| GLYMA_01G028800 | <i>Glycine max</i> F-box/kelch-repeat protein At1g23390, mRNA                                              |
| GLYMA_11G111400 | <i>Glycine max</i> fructose-bisphosphate aldolase 1, chloroplastic, mRNA                                   |
| GLYMA_17G100700 | <i>Glycine max</i> geranylgeranyl diphosphate reductase, chloroplastic, mRNA                               |
| GLYMA_06G015900 | <i>Glycine max</i> glyceraldehyde-3-phosphate dehydrogenase B subunit, transcript variant 2, mRNA          |
| GLYMA_05G180600 | <i>Glycine max</i> inositol-3-phosphate synthase , mRNA                                                    |
| GLYMA_07G185400 | <i>Glycine max</i> malate dehydrogenase, glyoxysomal-like, mRNA                                            |
| GLYMA_17G063000 | <i>Glycine max</i> NADPH--cytochrome P450 reductase 2, mRNA                                                |
| GLYMA_11G061300 | <i>Glycine max</i> oxygen-evolving enhancer protein 1, chloroplastic-like                                  |
| GLYMA_08G124900 | <i>Glycine max</i> PDZ and TPR domain-containing protein, mRNA                                             |
| GLYMA_01G214300 | <i>Glycine max</i> PGR5-like protein 1A, chloroplastic, transcript variant X2, misc_RNA                    |
| GLYMA_10G222600 | <i>Glycine max</i> phytosulfokine receptor 2, mRNA                                                         |
| GLYMA_04G020300 | <i>Glycine max</i> plastocyanin, mRNA                                                                      |
| GLYMA_11G014900 | <i>Glycine max</i> probable acyl-activating enzyme 1, peroxisomal, mRNA                                    |
| GLYMA_10G212200 | <i>Glycine max</i> probable ubiquitin-conjugating enzyme E2 C, mRNA                                        |
| GLYMA_01G077600 | <i>Glycine max</i> protease Do-like 9, transcript variant X2, mRNA                                         |
| GLYMA_19G260600 | <i>Glycine max</i> protein curvature thylakoid 1B-like, mRNA                                               |
| GLYMA_18G213500 | <i>Glycine max</i> protein fatty acid export 3, chloroplastic, transcript variant X2, mRNA                 |
| GLYMA_09G043800 | <i>Glycine max</i> protein pleiotropic regulatory locus 1, transcript variant X2, mRNA                     |
| GLYMA_09G227100 | <i>Glycine max</i> protein reticulata-related 4, chloroplastic, mRNA                                       |
| GLYMA_08G309300 | <i>Glycine max</i> ribose-phosphate pyrophosphokinase 4                                                    |
| GLYMA_16G089000 | <i>Glycine max</i> putative 1-deoxy-D-xylulose 5-phosphate reductoisomerase (DXR2)                         |
| GLYMA_03G202900 | <i>Glycine max</i> putative chloroplast RNA-binding protein 33, mRNA; nuclear gene for chloroplast product |
| GLYMA_17G073300 | <i>Glycine max</i> signal recognition particle receptor subunit alpha, mRNA                                |

(continued table)

| Accession number | Annotations                                                                        |
|------------------|------------------------------------------------------------------------------------|
| GLYMA_02G195400  | <i>Glycine max</i> syntaxin-121, mRNA                                              |
| GLYMA_20G001600  | <i>Glycine max</i> transcription factor TCP7, mRNA                                 |
| GLYMA_08G206000  | <i>Glycine max</i> translation machinery associated TMA7 superfamily protein, mRNA |
| GLYMA_19G127700  | <i>Glycine max</i> tubulin beta-4 chain, mRNA                                      |
| GLYMA_16G037700  | <i>Glycine max</i> U5 small nuclear ribonucleoprotein 40 kDa protein-like, mRNA    |
| GLYMA_09G023700  | <i>Glycine max</i> ubiquitin-40S ribosomal protein S27a                            |
| GLYMA_08G112000  | <i>Glycine max</i> UBX domain-containing protein 1, transcript variant X2, mRNA    |

**Table S4** Primers used in this study.

| Primer name   | Sequence (5'-3')                 | Purpose                        |
|---------------|----------------------------------|--------------------------------|
| Gm-TNL-ID1-F  | ATGTCGAAGGCAGTTTCAGAATC          | ORF sequence<br>cloned in pCE2 |
| Gm-TNL-ID1-R  | TTATAAGATGGTGGGTTTATAAGGATC      |                                |
| Gm-TNL-ID2-F  | ATGGCTTCTAAGGCCATCATCC           |                                |
| Gm-TNL-ID2-R  | CTACTGCTGCTTCCACTGT              |                                |
| Gm-TNL-ID3-F  | ATGGAATTAGAGTCTTCTTC             |                                |
| Gm-TNL-ID3-R  | TTACAATTCTTCTCTGCGTGGAATAC       |                                |
| Gm-TNL-ID5-F  | ATGTTGTATTTTTTGTCTA              |                                |
| Gm-TNL-ID5-R  | TTAAACATGGAGCGAGTCATG            |                                |
| Gm-TNL-ID7-F  | ATGTCATCTTCTTCATTCTCAAC          |                                |
| Gm-TNL-ID7-R  | CTACTGCTCTTCATTTTACTTGATA        |                                |
| Gm-TNL-ID8-F  | ATGGAATGCAAGAAACAAGGAG           |                                |
| Gm-TNL-ID8-R  | TCAATCGTTGAACCTTACTTAACACTG      |                                |
| Gm-TNL-ID9-F  | ATGGCTGTGATGCTGTGTGGAG           |                                |
| Gm-TNL-ID9-R  | TTAATCAAACCCTTCATGCCTTAAG        |                                |
| Gm-TNL-ID10-F | ATGTCCAACAAAGCTGCTCC             |                                |
| Gm-TNL-ID10-R | TCAGTCACTGTCATGCAATTC            |                                |
| Gm-TNL-ID11-F | ATGGCTTGGGGATCACG                |                                |
| Gm-TNL-ID11-R | TTATATGTATTCATAACAAAAGGTTGG      |                                |
| Gm-TNL-ID12-F | ATGGCTACGGGATCACCT               |                                |
| Gm-TNL-ID12-R | TTACGTAAACATGTAACATGTATCTCTC     |                                |
| Gm-TNL-ID14-F | ATGGCTTGGGGATCAAGTTC             |                                |
| Gm-TNL-ID14-R | TTATCTGTATTCTGAAATATAAGGTTGGC    |                                |
| Gm-TNL-ID15-F | ATGACACAGCAATCATGTTCC            |                                |
| Gm-TNL-ID15-R | TTACCTTAAATCAATGGATTGACAG        |                                |
| Gm-TNL-ID16-F | ATGGCTTCCAACAACAACAG             |                                |
| Gm-TNL-ID16-R | CTAGTTCCATCTTCCAAGAAAGG          |                                |
| Gm-TNL-ID17-F | ATGGCTTCCTCGGCCTT                |                                |
| Gm-TNL-ID17-R | TTATAACTTGCAGGATTGACTTGC         |                                |
| Gm-TNL-ID18-F | ATGCCAACAGAGATTGCAATG            |                                |
| Gm-TNL-ID18-R | TCAAGTTTGACCTAACATTCTTTTAC       |                                |
| Gm-TNL-ID19-F | ATGCCTCCGATCGTGAAAT              |                                |
| Gm-TNL-ID19-R | TCATTCAATTTTCTTCTTTTCTGTTTTT     |                                |
| Gm-TNL-ID21-F | ATGGAATTCGTGGCTTCTTC             |                                |
| Gm-TNL-ID21-R | CTACTGCTCTTGAATCTTGCTCG          |                                |
| Gm-TNL-ID23-F | ATGGCTTTCCAAGTTTCTCATA           |                                |
| Gm-TNL-ID23-R | TCACCCATTCCACACGGA               |                                |
| Gm-TNL-ID24-F | ATGCCATATTCTTATTCGTCCG           |                                |
| Gm-TNL-ID24-R | TTATTCTACTAACCTTCTAAATAAATCCTAGA |                                |
| Gm-TNL-ID25-F | ATGAAGTTGGTTCTATATCCAACAG        |                                |
| Gm-TNL-ID25-R | CTATTCCAAGTCGCGTATGGC            |                                |

(continued table)

| Primer name             | Sequence (5'-3')                                       | Purpose                         |
|-------------------------|--------------------------------------------------------|---------------------------------|
| Gm-TNL-ID26-F           | ATGGCTGCGACAACACG                                      |                                 |
| Gm-TNL-ID26-R           | CTATGGTTTGTAGTCTGATGCAG                                |                                 |
| Gm-TNL-ID28-F           | ATGTCCTCCTCCTCCATTAGCT                                 |                                 |
| Gm-TNL-ID28-R           | CTAAAAATAACCAAATGATGACTTATTGG                          |                                 |
| Gm-TNL-ID29-F           | ATGGCTAAGCAATCATCCTCAT                                 |                                 |
| Gm-TNL-ID29-R           | TCATTGATTGTTGCGGCG                                     |                                 |
| Gm-TNL-ID30-F           | ATGGCTATGCAATCATCCTCA                                  |                                 |
| Gm-TNL-ID30-R           | TTATGATTCTGAACTATTGAAATCATCA                           |                                 |
| Gm-TNL-ID35-F           | ATGGCTGTGCGATCATTCTC                                   |                                 |
| Gm-TNL-ID35-R           | TTATGAACTAATGAGATCATCATTTAATTTTT                       |                                 |
| Gm-TNL-ID36-F           | ATGGCTCTGCGATCATTCT                                    |                                 |
| Gm-TNL-ID36-R           | CTACAAATTGTGTCACAACACTTC                               |                                 |
| Gm-TNL-ID39-F           | ATGCCCTCACTATTGCGAG                                    |                                 |
| Gm-TNL-ID39-R           | TTACCAGAAGTCACACATTACAAT                               |                                 |
| BD-ID1 <sup>X</sup> -F  | CatatggccatggaggccgaattcTACCTCGAGAAGGAGGTTTTTC         | ID <sup>X</sup> sequence cloned |
| BD-ID1 <sup>X</sup> -R  | tagttatgcgccgctgcaggtcgacTTATAAGATGGTGGGTTATAAGGATC    | in pGBK17                       |
| BD-ID2 <sup>X</sup> -F  | catatggccatggaggccgaattcAATGACAGGAAATATTTTAGATATTGC    |                                 |
| BD-ID2 <sup>X</sup> -R  | tagttatgcgccgctgcaggtcgacCTACTGCTGCTTCCACTGT           |                                 |
| BD-ID3 <sup>X</sup> -F  | catatggccatggaggccgaattcAAGGATATATTCCTTGATGTGTG        |                                 |
| BD-ID3 <sup>X</sup> -R  | tagttatgcgccgctgcaggtcgacTTACAATTCTTCTGCGTGGAAATAC     |                                 |
| BD-ID4 <sup>X</sup> -F  | catatggccatggaggccgaattcGAAGATGAAAAGGGAATTTTCCTTG      |                                 |
| BD-ID4 <sup>X</sup> -R  | tagttatgcgccgctgcaggtcgacTTATACAATTGATAATACAAGCAACC    |                                 |
| BD-ID5 <sup>X</sup> -F  | catatggccatggaggccgaattcCAGATTTTTCTAGATTGGCATGTTT      |                                 |
| BD-ID5 <sup>X</sup> -R  | tagttatgcgccgctgcaggtcgacTTAAACATGGAGCGAGTCATG         |                                 |
| BD-ID7 <sup>X</sup> -F  | catatggccatggaggccgaattcGAAAAGGATATTTTCTGATATATGTTGTT  |                                 |
| BD-ID7 <sup>X</sup> -R  | tagttatgcgccgctgcaggtcgacCTACTGCTCTTCATTTTACTTGATA     |                                 |
| BD-ID8 <sup>X</sup> -F  | catatggccatggaggccgaattcTTTTCTGCAGATATAGGACAAGAAG      |                                 |
| BD-ID8 <sup>X</sup> -R  | tagttatgcgccgctgcaggtcgacTCAATCGTGAACCTACTTAACACTG     |                                 |
| BD-ID9 <sup>X</sup> -F  | catatggccatggaggccgaattcATTCCCAACAAAGAGGTCAGAA         |                                 |
| BD-ID9 <sup>X</sup> -R  | tagttatgcgccgctgcaggtcgacTTAATCAAACCTTCATGCCTTAAG      |                                 |
| BD-ID10 <sup>X</sup> -F | catatggccatggaggccgaattcGATCGTAAAGAGCAACAAATTTTCT      |                                 |
| BD-ID10 <sup>X</sup> -R | tagttatgcgccgctgcaggtcgacTCAGTCACTGTCATGCAATTC         |                                 |
| BD-ID11 <sup>X</sup> -F | catatggccatggaggccgaattcGAAGAAGAGAAGAAAGTTTTCTTGAC     |                                 |
| BD-ID11 <sup>X</sup> -R | tagttatgcgccgctgcaggtcgacTTATATGATTCACTAACAAAAGGTTGG   |                                 |
| BD-ID12 <sup>X</sup> -F | catatggccatggaggccgaattcATGGCTACGGGATCACCT             |                                 |
| BD-ID12 <sup>X</sup> -R | tagttatgcgccgctgcaggtcgacTTACGTAAACATGTATCTCTC         |                                 |
| BD-ID13 <sup>X</sup> -F | catatggccatggaggccgaattcGAAGAGAAAAGTGTTTTCTTGACC       |                                 |
| BD-ID13 <sup>X</sup> -R | tagttatgcgccgctgcaggtcgacTCAAACATCTACAAAAGGTGCAC       |                                 |
| BD-ID14 <sup>X</sup> -F | catatggccatggaggccgaattcAAGGAAATTCTAGATGTACTTACAGTA    |                                 |
| BD-ID14 <sup>X</sup> -R | tagttatgcgccgctgcaggtcgacTTATCTGTATTCTGAAATATAAGGTTGGC |                                 |
| BD-ID15 <sup>X</sup> -F | catatggccatggaggccgaattcAATGAGAAGGAAGTTTTCCTTGAC       |                                 |
| BD-ID15 <sup>X</sup> -R | tagttatgcgccgctgcaggtcgacTTACCTTAAATCAATGGATTGACAG     |                                 |

(continued table)

| Primer name             | Sequence (5'-3')                                            | Purpose           |
|-------------------------|-------------------------------------------------------------|-------------------|
| BD-ID16 <sup>+</sup> -F | catatggccatggagccgaattcAACAAAGATATTCTGGATGTGCTTC            |                   |
| BD-ID16 <sup>+</sup> -R | tagttatgcggccgctgcaggtcgacCTAGTTCCATCTCCAAAAGAAAGG          |                   |
| BD-ID17 <sup>+</sup> -F | catatggccatggagccgaattcGTCAATGCATTCTGTAATATTATCTGG          |                   |
| BD-ID17 <sup>+</sup> -R | tagttatgcggccgctgcaggtcgacTTATAACTTGCAGGATTGACTTGC          |                   |
| BD-ID18 <sup>+</sup> -F | catatggccatggagccgaattcGATACAGAGAGACATATTCCTTGA             |                   |
| BD-ID18 <sup>+</sup> -R | tagttatgcggccgctgcaggtcgacTCAAGTTTGACCTAACATTCTTTCAC        |                   |
| BD-ID19 <sup>+</sup> -F | catatggccatggagccgaattcGATACAGAGAGAAATATTCCTTGAT            |                   |
| BD-ID19 <sup>+</sup> -R | tagttatgcggccgctgcaggtcgacTCAITCAATTTTCTTCTTTTCTGTTTT       |                   |
| BD-ID21 <sup>+</sup> -F | catatggccatggagccgaattcCCCTTGAAAAGGATATATTCCTTG             |                   |
| BD-ID21 <sup>+</sup> -R | tagttatgcggccgctgcaggtcgacCTACTGCTCTTGAATCTTGCTCG           |                   |
| BD-ID22 <sup>+</sup> -F | catatggccatggagccgaattcGAGAAAAATATTTCTTAGATATTGCATGT        |                   |
| BD-ID22 <sup>+</sup> -R | tagttatgcggccgctgcaggtcgacTTAATCGAAGAATTCATTGTGTAATG        |                   |
| BD-ID23 <sup>+</sup> -F | catatggccatggagccgaattcGAAAAGAAGATACTTATGGATATTGCATG        |                   |
| BD-ID23 <sup>+</sup> -R | tagttatgcggccgctgcaggtcgacTCACCCATTCCACACGGA                |                   |
| BD-ID24 <sup>+</sup> -F | catatggccatggagccgaattcGAAAAGAAGATATTTTGGATATTGCATG         |                   |
| BD-ID24 <sup>+</sup> -R | tagttatgcggccgctgcaggtcgacTTATICTACTAACCTTCTAAAATAAATCCTAGA |                   |
| BD-ID25 <sup>+</sup> -F | catatggccatggagccgaattcAAGGAAATCTTGAAGATACTTAAAGTAAGC       |                   |
| BD-ID25 <sup>+</sup> -R | tagttatgcggccgctgcaggtcgacCTATTCCAAGTCGCGTATGGC             |                   |
| BD-ID26 <sup>+</sup> -F | catatggccatggagccgaattcGATGAAATCCAAGAGATTCTAAAAGTAAG        |                   |
| BD-ID26 <sup>+</sup> -R | tagttatgcggccgctgcaggtcgacCTATGTTTGTAGTCTGATGCAG            |                   |
| BD-ID28 <sup>+</sup> -F | catatggccatggagccgaattcAAAAAGATTCAAGACGTACTCAAAGT           |                   |
| BD-ID28 <sup>+</sup> -R | tagttatgcggccgctgcaggtcgacCTAAAAATAACCAATGATGACTTATTTGG     |                   |
| BD-ID29 <sup>+</sup> -F | catatggccatggagccgaattcAAGAGATCCAAGAGATACTTAAAGTG           |                   |
| BD-ID29 <sup>+</sup> -R | tagttatgcggccgctgcaggtcgacTCATTGATTGTTGCGGCC                |                   |
| BD-ID30 <sup>+</sup> -F | catatggccatggagccgaattcAAGAGATCCAAGAGATACTTAAAGTG           |                   |
| BD-ID30 <sup>+</sup> -R | tagttatgcggccgctgcaggtcgacTTATGATTCTGAATATTGAAATCATCAA      |                   |
| BD-ID35 <sup>+</sup> -F | catatggccatggagccgaattcGATAAAAGTATCTATATGATACTTAAAGTAAGCT   |                   |
| BD-ID35 <sup>+</sup> -R | tagttatgcggccgctgcaggtcgacTTATGAACATAAGATCATCATTTAATTTTT    |                   |
| BD-ID36 <sup>+</sup> -F | catatggccatggagccgaattcAAAAAGATCTATGACATACTTAAAGTAAGC       |                   |
| BD-ID36 <sup>+</sup> -R | tagttatgcggccgctgcaggtcgacCTACAAATTGTGTCACAACCTTC           |                   |
| BD-ID37 <sup>+</sup> -F | catatggccatggagccgaattcGATACAGAGAAAGGAATATTCCTTGAT          |                   |
| BD-ID37 <sup>+</sup> -R | tagttatgcggccgctgcaggtcgacTTAACCTTGATTTTCTTATTTTCTGAG       |                   |
| BD-ID38 <sup>+</sup> -F | catatggccatggagccgaattcACTGAGCAGGAAATATTTCTAGACAT           |                   |
| BD-ID38 <sup>+</sup> -R | tagttatgcggccgctgcaggtcgacCTAAATGTCAAATATGCATAAGCTGG        |                   |
| BD-ID39 <sup>+</sup> -F | catatggccatggagccgaattcGATGATGAGAAAACATTTTCTTGAC            |                   |
| BD-ID39 <sup>+</sup> -R | tagttatgcggccgctgcaggtcgacTTACCAGAAGTCACACATTACAAT          |                   |
| qRT-PCR-SMV-F           | CCGCTGAAACCCATTGTTGA                                        | qRT-PCR for virus |
| qRT-PCR-SMV-R           | GCGGGCCAGTTCTCTATCTC                                        | titer detection   |
| qRT-PCR-TMV-F           | CACGACTGCCGAAACGTTAG                                        |                   |
| qRT-PCR-TMV-R           | TCAAGTTGCAGGACCAGAGG                                        |                   |
| qRT-PCR-PPV-F           | GAGAAGGCGAGGAGGAAGTT                                        |                   |
| qRT-PCR-PPV-R           | TGCAGGCTGTATGACTGGAG                                        |                   |

(continued table)

| Primer name        | Sequence (5'-3')                                 | Purpose     |          |
|--------------------|--------------------------------------------------|-------------|----------|
| qRT-PCR-PCV-F      | CAGTCTTACGAGCAGCGACA                             |             |          |
| qRT-PCR-PCV-R      | TGTCACGCACCAACCAAAAC                             |             |          |
| qRT-PCR-BSMV-F     | GAAAGTGTGCTGGCCTTTCG                             |             |          |
| qRT-PCR-BSMV-R     | CATCTGAGCGCTGACTCGTA                             |             |          |
| qRT-PCR-TRV2-F     | ACTACCAAGCGAACAACCTGG                            |             |          |
| qRT-PCR-TRV2-R     | GAGGCGGTGCAGATGAACTA                             |             |          |
| pCambia1300-ID1-F  | gagaacacgggggacgagctcATGTCGAAGGCAGTTTCAGAATC     | ORF         | sequence |
| pCambia1300-ID1-R  | atttgttgatccgggtaccTTATAAGATGGTGGTTTATAAGGATC    | cloned      | in       |
| pCambia1300-ID2-F  | gagaacacgggggacgagctcATGGCTTCTAAGGCCATCATCC      | pCambia1300 |          |
| pCambia1300-ID2-R  | atttgttgatccgggtaccCTACTGCTGCTTCCACTGT           |             |          |
| pCambia1300-ID3-F  | gagaacacgggggacgagctcATGGAATTAGAGTCTTCTTC        |             |          |
| pCambia1300-ID3-R  | atttgttgatccgggtaccTTACAATTCTTCTGCGTGGAAATAC     |             |          |
| pCambia1300-ID5-F  | gagaacacgggggacgagctcATGTTGTAATTTTTTGCTA         |             |          |
| pCambia1300-ID5-R  | atttgttgatccgggtaccTTAAACATGGAGCGAGTCATG         |             |          |
| pCambia1300-ID7-F  | gagaacacgggggacgagctcATGCATCTTCTTCATCTCAAC       |             |          |
| pCambia1300-ID7-R  | atttgttgatccgggtaccCTACTGCTCTTCATTTTACTTGATA     |             |          |
| pCambia1300-ID8-F  | gagaacacgggggacgagctcATGGAATGCAAGAAACAAGGAG      |             |          |
| pCambia1300-ID8-R  | atttgttgatccgggtaccTCAATCGTTGAACCTACTTAACACTG    |             |          |
| pCambia1300-ID9-F  | gagaacacgggggacgagctcATGGCTGTGATGCTGTGTGGAG      |             |          |
| pCambia1300-ID9-R  | atttgttgatccgggtaccTTAATCAAACCTTCATGCCTTAAG      |             |          |
| pCambia1300-ID10-F | gagaacacgggggacgagctcATGTCCAACAAGCTGTCTC         |             |          |
| pCambia1300-ID10-R | atttgttgatccgggtaccTCAGTCACTGTCATGCAATTC         |             |          |
| pCambia1300-ID11-F | gagaacacgggggacgagctcATGGCTTGGGGATCACG           |             |          |
| pCambia1300-ID11-R | atttgttgatccgggtaccTTATATGTAATCACTAACAAGGTTGG    |             |          |
| pCambia1300-ID12-F | gagaacacgggggacgagctcATGGCTACGGGATCACCT          |             |          |
| pCambia1300-ID12-R | atttgttgatccgggtaccTTACGTAAACATGTAACATGTATCTCTC  |             |          |
| pCambia1300-ID14-F | gagaacacgggggacgagctcATGGCTTGGGGATCAAGTTC        |             |          |
| pCambia1300-ID14-R | atttgttgatccgggtaccTTATCTGTATTCTGAAATATAAGGTTGGC |             |          |
| pCambia1300-ID15-F | gagaacacgggggacgagctcATGACACAGCAATCATGTTC        |             |          |
| pCambia1300-ID15-R | atttgttgatccgggtaccTTACCTTAAATCAATGGATTGACAG     |             |          |
| pCambia1300-ID16-F | gagaacacgggggacgagctcATGGCTTCCAACAACAACAG        |             |          |
| pCambia1300-ID16-R | atttgttgatccgggtaccTAGTTTCCATCTTCCAAGAAAGG       |             |          |
| pCambia1300-ID17-F | gagaacacgggggacgagctcATGGCTTCCTCGCCTT            |             |          |
| pCambia1300-ID17-R | atttgttgatccgggtaccTTATAACTTGACGATTGACTTGC       |             |          |
| pCambia1300-ID18-F | gagaacacgggggacgagctcATGCCAACAGAGATTGCAATG       |             |          |
| pCambia1300-ID18-R | atttgttgatccgggtaccTCAAGTTGACCTAACATCTTTACAC     |             |          |
| pCambia1300-ID19-F | gagaacacgggggacgagctcATGCCCTCCGATCGTGAAAT        |             |          |
| pCambia1300-ID19-R | atttgttgatccgggtaccTCATCAATTTTCTTCTTTCTGTTTT     |             |          |
| pCambia1300-ID21-F | gagaacacgggggacgagctcATGGAATTCGTGGCTTCTTC        |             |          |
| pCambia1300-ID21-R | atttgttgatccgggtaccCTACTGCTCTTGAATCTTGCTCG       |             |          |
| pCambia1300-ID23-F | gagaacacgggggacgagctcATGGCTTCCAAGTTTCTCATA       |             |          |
| pCambia1300-ID23-R | atttgttgatccgggtaccTCACCATTCACACGGA              |             |          |



(continued table)

| Primer name                                 | Sequence (5'-3')                                     | Purpose                         |
|---------------------------------------------|------------------------------------------------------|---------------------------------|
| pCambia1300-ID24-F                          | gagaacacgggggacgagctcATGCCATATTCTTATTCGTTCCG         |                                 |
| pCambia1300-ID24-R                          | atttggtggatccgggtaccTTATTCTACTAACCTTCTAAATAAATCCTAGA |                                 |
| pCambia1300-ID25-F                          | gagaacacgggggacgagctcATGAAGTTTGGTTCTATATTCCAACAG     |                                 |
| pCambia1300-ID25-R                          | atttggtggatccgggtaccCTATTCCAAGTCGCGTATGGC            |                                 |
| pCambia1300-ID26-F                          | gagaacacgggggacgagctcATGGCTGCGACAACACG               |                                 |
| pCambia1300-ID26-R                          | atttggtggatccgggtaccCTATGGTTTGTAGTCTGATGCAG          |                                 |
| pCambia1300-ID28-F                          | gagaacacgggggacgagctcATGTCCTCTCTCCATTAGCT            |                                 |
| pCambia1300-ID28-R                          | atttggtggatccgggtaccCTAAAAATAACCAAATGATGACTTAATTGG   |                                 |
| pCambia1300-ID29-F                          | gagaacacgggggacgagctcATGGCTAAGCAATCATCCTCAT          |                                 |
| pCambia1300-ID29-R                          | atttggtggatccgggtaccTCATTGATTGTTGCGGCG               |                                 |
| pCambia1300-ID30-F                          | gagaacacgggggacgagctcATGGCTATGCAATCATCCTCA           |                                 |
| pCambia1300-ID30-R                          | atttggtggatccgggtaccTTATGATTCTGAACATTGAAATCATCAA     |                                 |
| pCambia1300-ID35-F                          | gagaacacgggggacgagctcATGGCTGTGCGATCATTCTC            |                                 |
| pCambia1300-ID35-R                          | atttggtggatccgggtaccTTATGAATAATGAGATCATCATTTAATTTTTT |                                 |
| pCambia1300-ID36-F                          | gagaacacgggggacgagctcATGGCTCTGCGATCATCTCT            |                                 |
| pCambia1300-ID36-R                          | atttggtggatccgggtaccCTACAAATTGTGTCTCAACAACCTC        |                                 |
| pCambia1300-ID39-F                          | gagaacacgggggacgagctcATGCCCTCACTATTGCGAG             |                                 |
| pCambia1300-ID39-R                          | atttggtggatccgggtaccTTACCAGAAGTCACACATTACAAT         |                                 |
| pC-SRC7 <sup>TN</sup> -F                    | gagaacacgggggacgagctcATGGCTGCAACGAAACGTTCCCTTGC      | SRC7 <sup>TN</sup> cloned in    |
| pC-SRC7 <sup>TN</sup> -R                    | TGTTTCCTGCTTTGTAGCATCA                               | pCambia1300                     |
| pC-SRC7 <sup>TN</sup> -ID1 <sup>X</sup> -F  | tgatgctacaaagcaggaacaTACCTCGAGAAGGAGGTTTTTC          | ID <sup>X</sup> sequence cloned |
| pC-SRC7 <sup>TN</sup> -ID1 <sup>X</sup> -R  | atttggtggatccgggtaccTTATAAGATGGTGGGTTTATAAGGATC      | after SRC7 <sup>TN</sup> in     |
| pC-SRC7 <sup>TN</sup> -ID2 <sup>X</sup> -F  | tgatgctacaaagcaggaacaAATGACAGGAAATATTTTATGATATTGC    | pCambia1300                     |
| pC-SRC7 <sup>TN</sup> -ID2 <sup>X</sup> -R  | atttggtggatccgggtaccCTACTGCTGCTTCCACTGT              |                                 |
| pC-SRC7 <sup>TN</sup> -ID3 <sup>X</sup> -F  | tgatgctacaaagcaggaacaAAGGATATATTCCTTGATGTGTGT        |                                 |
| pC-SRC7 <sup>TN</sup> -ID3 <sup>X</sup> -R  | atttggtggatccgggtaccTTACAATTCTTCTGCTGGGAAATAC        |                                 |
| pC-SRC7 <sup>TN</sup> -ID4 <sup>X</sup> -F  | tgatgctacaaagcaggaacaGAAGATGAAAAGGGAATTTTCCTTG       |                                 |
| pC-SRC7 <sup>TN</sup> -ID4 <sup>X</sup> -R  | atttggtggatccgggtaccTTATACAACCTTGATAATACAAGCAACC     |                                 |
| pC-SRC7 <sup>TN</sup> -ID5 <sup>X</sup> -F  | tgatgctacaaagcaggaacaCAGATTTTCTAGATTGGCATGTTT        |                                 |
| pC-SRC7 <sup>TN</sup> -ID5 <sup>X</sup> -R  | atttggtggatccgggtaccTTAAACATGGAGCGAGTCATG            |                                 |
| pC-SRC7 <sup>TN</sup> -ID7 <sup>X</sup> -F  | tgatgctacaaagcaggaacaGAAAAGGATATATTTCTTGATATGTGTT    |                                 |
| pC-SRC7 <sup>TN</sup> -ID7 <sup>X</sup> -R  | atttggtggatccgggtaccCTACTGCTCTTCATTTTACTTGATA        |                                 |
| pC-SRC7 <sup>TN</sup> -ID8 <sup>X</sup> -F  | tgatgctacaaagcaggaacaTTTTCTGCAGATATAGGGACAAGAAG      |                                 |
| pC-SRC7 <sup>TN</sup> -ID8 <sup>X</sup> -R  | atttggtggatccgggtaccTCAATCGTTGAACCTTAAACACTG         |                                 |
| pC-SRC7 <sup>TN</sup> -ID9 <sup>X</sup> -F  | tgatgctacaaagcaggaacaATTCCCAACAAGAGGTTTCAGAA         |                                 |
| pC-SRC7 <sup>TN</sup> -ID9 <sup>X</sup> -R  | atttggtggatccgggtaccTTAATCAAACCCTTCATGCCTTAAAG       |                                 |
| pC-SRC7 <sup>TN</sup> -ID10 <sup>X</sup> -F | tgatgctacaaagcaggaacaGATCGTAAAGAGCAACAAATTTTCT       |                                 |
| pC-SRC7 <sup>TN</sup> -ID10 <sup>X</sup> -R | atttggtggatccgggtaccTCAGTCACTGTCATGCAATTC            |                                 |
| pC-SRC7 <sup>TN</sup> -ID11 <sup>X</sup> -F | tgatgctacaaagcaggaacaGAAGAAGAGAAGAAAGTTTTTCTTGAC     |                                 |
| pC-SRC7 <sup>TN</sup> -ID11 <sup>X</sup> -R | atttggtggatccgggtaccTTATATGTATTTACTAACAAAAGTTGG      |                                 |

(continued table)

| Primer name                                 | Sequence (5'-3')                                        | Purpose |
|---------------------------------------------|---------------------------------------------------------|---------|
| pC-SRC7 <sup>TN</sup> -ID12 <sup>X</sup> -F | tgatgctacaagcaggaaacaATGGCTACGGGATCACCT                 |         |
| pC-SRC7 <sup>TN</sup> -ID12 <sup>X</sup> -R | atttgttggatccgggtaccTTACGTAAACATGTAACATGTATCTCTC        |         |
| pC-SRC7 <sup>TN</sup> -ID13 <sup>X</sup> -F | tgatgctacaagcaggaaacaGAAGAGAAAAGTGTTTTCTTGACC           |         |
| pC-SRC7 <sup>TN</sup> -ID13 <sup>X</sup> -R | atttgttggatccgggtaccTCAAACATCTACAAAAGGTGCAC             |         |
| pC-SRC7 <sup>TN</sup> -ID14 <sup>X</sup> -F | tgatgctacaagcaggaaacaAAGGAAATTCTAGATGTACTTACAGTA        |         |
| pC-SRC7 <sup>TN</sup> -ID14 <sup>X</sup> -R | atttgttggatccgggtaccTTATCTGTATTCTGAAATATAAGGTGGC        |         |
| pC-SRC7 <sup>TN</sup> -ID15 <sup>X</sup> -F | tgatgctacaagcaggaaacaAATGAGAAGGAAGTTTTCCTTGAC           |         |
| pC-SRC7 <sup>TN</sup> -ID15 <sup>X</sup> -R | atttgttggatccgggtaccTTACCTTAAATCAATGGATTGACAG           |         |
| pC-SRC7 <sup>TN</sup> -ID16 <sup>X</sup> -F | tgatgctacaagcaggaaacaAACAAGATATTCTGGATGTGCTTC           |         |
| pC-SRC7 <sup>TN</sup> -ID16 <sup>X</sup> -R | atttgttggatccgggtaccCTAGTTCCATCTTCCAAAGAAAGG            |         |
| pC-SRC7 <sup>TN</sup> -ID17 <sup>X</sup> -F | tgatgctacaagcaggaaacaGTCAATGCATTCGTAAATATTACTGG         |         |
| pC-SRC7 <sup>TN</sup> -ID17 <sup>X</sup> -R | atttgttggatccgggtaccTTATACTTGACGATTGACTTGC              |         |
| pC-SRC7 <sup>TN</sup> -ID18 <sup>X</sup> -F | tgatgctacaagcaggaaacaGATACAGAGAGACATATTCCTTGA           |         |
| pC-SRC7 <sup>TN</sup> -ID18 <sup>X</sup> -R | atttgttggatccgggtaccTCAAGTTTGACCTAACATCTTTCAC           |         |
| pC-SRC7 <sup>TN</sup> -ID19 <sup>X</sup> -F | tgatgctacaagcaggaaacaGATACAGAGAGAAATATTCCTTGAT          |         |
| pC-SRC7 <sup>TN</sup> -ID19 <sup>X</sup> -R | atttgttggatccgggtaccTCATTC AATTTTCTTCTTTCTGTTTT         |         |
| pC-SRC7 <sup>TN</sup> -ID21 <sup>X</sup> -F | tgatgctacaagcaggaaacaCCCTTGGAAAAGGATATATTCCTTG          |         |
| pC-SRC7 <sup>TN</sup> -ID21 <sup>X</sup> -R | atttgttggatccgggtaccCTACTGCTCTTGAATCTTGCTCG             |         |
| pC-SRC7 <sup>TN</sup> -ID22 <sup>X</sup> -F | tgatgctacaagcaggaaacaGAGAAAAATATTTCTTAGATATTGCATG       |         |
| pC-SRC7 <sup>TN</sup> -ID22 <sup>X</sup> -R | atttgttggatccgggtaccTTAATCGAAGAATTCATTGTTGAATG          |         |
| pC-SRC7 <sup>TN</sup> -ID23 <sup>X</sup> -F | tgatgctacaagcaggaaacaGAAAAGAAGATACTTATGGATATTCATG       |         |
| pC-SRC7 <sup>TN</sup> -ID23 <sup>X</sup> -R | atttgttggatccgggtaccTCACCCATTCCACACGGA                  |         |
| pC-SRC7 <sup>TN</sup> -ID24 <sup>X</sup> -F | tgatgctacaagcaggaaacaGAAAAGAAGATATTTTGGATATTGCATG       |         |
| pC-SRC7 <sup>TN</sup> -ID24 <sup>X</sup> -R | atttgttggatccgggtaccTTATTCTACTAACCTTCTAAAATAATCCTAGA    |         |
| pC-SRC7 <sup>TN</sup> -ID25 <sup>X</sup> -F | tgatgctacaagcaggaaacaAAGGAAATCTTGAAGATACTTAAAGTAAGC     |         |
| pC-SRC7 <sup>TN</sup> -ID25 <sup>X</sup> -R | atttgttggatccgggtaccCTATTCCAAGTCGCGTATGGC               |         |
| pC-SRC7 <sup>TN</sup> -ID26 <sup>X</sup> -F | tgatgctacaagcaggaaacaGATGAAATCCAAGAGATTCTAAAAGTAAG      |         |
| pC-SRC7 <sup>TN</sup> -ID26 <sup>X</sup> -R | atttgttggatccgggtaccCTATGGTTTGTAGTCTGATGCAG             |         |
| pC-SRC7 <sup>TN</sup> -ID28 <sup>X</sup> -F | tgatgctacaagcaggaaacaAAAAAGATTCAAGACGTA CTCAAAGT        |         |
| pC-SRC7 <sup>TN</sup> -ID28 <sup>X</sup> -R | atttgttggatccgggtaccCTAAAAATAACCAAATGATGACTTATTTGG      |         |
| pC-SRC7 <sup>TN</sup> -ID29 <sup>X</sup> -F | tgatgctacaagcaggaaacaAAAGAGATCCAAGAGATACTTAAAGTG        |         |
| pC-SRC7 <sup>TN</sup> -ID29 <sup>X</sup> -R | atttgttggatccgggtaccTCATTGATTGTTGCGGCG                  |         |
| pC-SRC7 <sup>TN</sup> -ID30 <sup>X</sup> -F | tgatgctacaagcaggaaacaAAAGAGATCCAAGAGATACTTAAAGTG        |         |
| pC-SRC7 <sup>TN</sup> -ID30 <sup>X</sup> -R | atttgttggatccgggtaccTTATGATTCTGAAC TATTGAAATCATCAA      |         |
| pC-SRC7 <sup>TN</sup> -ID35 <sup>X</sup> -F | tgatgctacaagcaggaaacaGATAAAAGTATCTATATGATACTTAAAGTAAGCT |         |
| pC-SRC7 <sup>TN</sup> -ID35 <sup>X</sup> -R | atttgttggatccgggtaccTTATGAACTAATGAGATCATCAITTAATTTTT    |         |
| pC-SRC7 <sup>TN</sup> -ID36 <sup>X</sup> -F | tgatgctacaagcaggaaacaAAAAAGATCTATGACATACTTAAAGTAAGC     |         |
| pC-SRC7 <sup>TN</sup> -ID36 <sup>X</sup> -R | atttgttggatccgggtaccCTACAAATTGTCTCAACAACCTC             |         |
| pC-SRC7 <sup>TN</sup> -ID37 <sup>X</sup> -F | tgatgctacaagcaggaaacaGATACAGAGAAAGGAATATTCCTTGAT        |         |
| pC-SRC7 <sup>TN</sup> -ID37 <sup>X</sup> -R | atttgttggatccgggtaccTTAACCTTGATTTTCTTATTTTCTGAG         |         |
| pC-SRC7 <sup>TN</sup> -ID38 <sup>X</sup> -F | tgatgctacaagcaggaaacaACTGAGCAGGAAATATTCTAGACAT          |         |
| pC-SRC7 <sup>TN</sup> -ID38 <sup>X</sup> -R | atttgttggatccgggtaccCTAAATGTCAAAATATGCATAAGCTGG         |         |

(continued table)

| Primer name                                 | Sequence (5'-3')                                       | Purpose                         |
|---------------------------------------------|--------------------------------------------------------|---------------------------------|
| pC-SRC7 <sup>TN</sup> -ID39 <sup>κ</sup> -F | tgatgtcacaagcaggaacaGATGATGAGAAAAACATTTTCTTGAC         |                                 |
| pC-SRC7 <sup>TN</sup> -ID39 <sup>κ</sup> -R | atttgttggatccgggtaccTTACCAGAAGTCACACATTACAAT           |                                 |
| BD-SRZ4-F                                   | catatggccatggaggccgaattcATGGCTTGGGGATCAAGTTC           |                                 |
| BD-SRZ4-R                                   | tagttatgcggcgcgtgcaggtcgacTTATCTGTATTCTGAAATATAAGGTGGC |                                 |
| pCambia1300-SRZ4 <sup>TIR</sup> -F          | gagaacacgggggacgagctcATGGCTTGGGGATCAAGTTC              | SRZ4 truncated                  |
| pCambia1300-SRZ4 <sup>TIR</sup> -R          | atttgttggatccgggtaccTTATGGGTAATCCGCAACATGTA            | sequence cloned in              |
| pCambia1300-SRZ4 <sup>NBS</sup> -F          | gagaacacgggggacgagctcATGGACTAGAGTCACGAGTGCTAGA         | pCambia1300                     |
| pCambia1300-SRZ4 <sup>NBS</sup> -R          | atttgttggatccgggtaccTTACTCCAAAGCATCAAAGCTTAC           |                                 |
| pCambia1300-SRZ4 <sup>TN</sup> -F           | gagaacacgggggacgagctcATGGCTTGGGGATCAAGTTC              |                                 |
| pCambia1300-SRZ4 <sup>TN</sup> -R           | atttgttggatccgggtaccTTACTCCAAAGCATCAAAGCTTAC           |                                 |
| pCambia1300-SRZ4 <sup>TNL</sup> -F          | gagaacacgggggacgagctcATGGCTTGGGGATCAAGTTC              |                                 |
| pCambia1300-SRZ4 <sup>TNL</sup> -R          | atttgttggatccgggtaccTTAACGCAAGCAGCCACTC                |                                 |
| pCambia1300-SRZ4 <sup>TNLZ</sup> -F         | gagaacacgggggacgagctcATGGCTTGGGGATCAAGTTC              |                                 |
| pCambia1300-SRZ4 <sup>TNLZ</sup> -R         | gagaacacgggggacgagctcTTAACTTCTCCAAAATGCAGCCA           |                                 |
| pCambia1300-SRZ4 <sup>NLZ3</sup> -F         | gagaacacgggggacgagctcATGGACTAGAGTCACGAGTGCTAGA         |                                 |
| pCambia1300-SRZ4 <sup>NLZ3</sup> -R         | gagaacacgggggacgagctcTTATAAACCGAATTGGCAA               |                                 |
| pCambia1300-SRZ4 <sup>Z3</sup> -F           | gagaacacgggggacgagctcATGAATGTGAGTGGTGCCATG             |                                 |
| pCambia1300-SRZ4 <sup>Z3</sup> -R           | gagaacacgggggacgagctcTTATAAACCGAATTGGCAA               |                                 |
| pQBV3-ID3 <sup>κ</sup> -F                   | AAAGCAGGCTCAGGGgatacATGAAGGATATATTCCTTGATGTGTG         | ID <sup>κ</sup> sequence cloned |
| pQBV3-ID3 <sup>κ</sup> -R                   | AGCTGGGTGCAGGGCgatacCAATCTCTCTCGCTGGAATAC              | in entry vector                 |
| pQBV3-ID13 <sup>κ</sup> -F                  | AAAGCAGGCTCAGGGgatacATGGAAGAGAAAAGTGTTTTCTTGACC        | pQBV3                           |
| pQBV3-ID13 <sup>κ</sup> -R                  | AGCTGGGTGCAGGGCgatacAACATCTACAAAAGGTGCAC               |                                 |
| pQBV3-ID16 <sup>κ</sup> -F                  | AAAGCAGGCTCAGGGgatacATGAACAAGATATTCTGGATGTGCTTC        |                                 |
| pQBV3-ID16 <sup>κ</sup> -R                  | AGCTGGGTGCAGGGCgatacGTTTCATCTTCCAAAGAAAGG              |                                 |
| pQBV3-ID25 <sup>κ</sup> -F                  | AAAGCAGGCTCAGGGgatacATGAAGGAAATCTTGAAGATACTTAAAG       |                                 |
| pQBV3-ID25 <sup>κ</sup> -R                  | AGCTGGGTGCAGGGCgatacTTCCAAGTCGCGTATGGC                 |                                 |
| pQBV3-ID29 <sup>κ</sup> -F                  | AAAGCAGGCTCAGGGgatacATGAAAGAGATCCAAGAGATACTTAAAG       |                                 |
| pQBV3-ID29 <sup>κ</sup> -R                  | AGCTGGGTGCAGGGCgatacTTGATTGTTGCGGCG                    |                                 |
| pQBV3-ID30 <sup>κ</sup> -F                  | AAAGCAGGCTCAGGGgatacATGAAAGAGATCCAAGAGATACTTAAAG       |                                 |
| pQBV3-ID30 <sup>κ</sup> -R                  | AGCTGGGTGCAGGGCgatacTGATTCTGAATATTGAAATCATCAA          |                                 |
| pQBV3-ID35 <sup>κ</sup> -F                  | AAAGCAGGCTCAGGGgatacATGGATAAAGTATCTATGATACTTA          |                                 |
| pQBV3-ID35 <sup>κ</sup> -R                  | AGCTGGGTGCAGGGCgatacTGAACATAAGATCATCATTTAATTTT         |                                 |
| pQBV3-CP-F                                  | AAAGCAGGCTCAGGGgatacATGTCAGGCAAGGAGAAAGAAGG            |                                 |
| pQBV3-CP-R                                  | AGCTGGGTGCAGGGCgatacCTGCTGTGGGCCCATGCCAG               |                                 |
| pQBV3-P3-F                                  | AAAGCAGGCTCAGGGgatacATGGGTGATGCGCAACAAAGGATG           |                                 |
| pQBV3-P3-R                                  | AGCTGGGTGCAGGGCgatacCTGTGCGGAAACATCTCTG                |                                 |
| pQBV3-6K2-F                                 | AAAGCAGGCTCAGGGgatacATGAGCAAACATGAGGTGAGCA             |                                 |
| pQBV3-6K2-R                                 | AGCTGGGTGCAGGGCgatacTTGAGTTGATACTGGTTCACG              |                                 |
| pQBV3-P1-F                                  | AAAGCAGGCTCAGGGgatacATGGCAACAATCATGATCGGAAG            |                                 |
| pQBV3-P1-R                                  | AGCTGGGTGCAGGGCgatacGTAATGTTGAATATCCTCTATG             |                                 |
| pQBV3-NIb-F                                 | AAAGCAGGCTCAGGGgatacATGGGAAAAAGGAAAGATGGGTT            |                                 |
| pQBV3-NIb-R                                 | AGCTGGGTGCAGGGCgatacTTGCAAAGAACTGATTAC                 |                                 |

(continued table)

| Primer name    | Sequence (5'-3')                                          | Purpose                            |
|----------------|-----------------------------------------------------------|------------------------------------|
| pQBV3-HC-Pro-F | AAAGCAGGCTCAGGgata <sup>c</sup> ATGTCCAAACTCTGAAGCTC      |                                    |
| pQBV3-HC-Pro-R | AGCTGGGTGCAGGGgata <sup>c</sup> ACCAACTCTATAAAATTTCATC    |                                    |
| pQBV3-SRZ4-F   | AAAGCAGGCTCAGGgata <sup>c</sup> ATGGCTTGGGGATCAAGTTC      |                                    |
| pQBV3-SRZ4-R   | AGCTGGGTGCAGGGgata <sup>c</sup> TCTGTATTCTGAAATATAAGGTGGC |                                    |
| T7             | TAATACGACTCACTATAGG                                       | AD universal primers for screening |
| 3'AD           | AGATGGTGCACGATGCACAG                                      | candidate proteins                 |

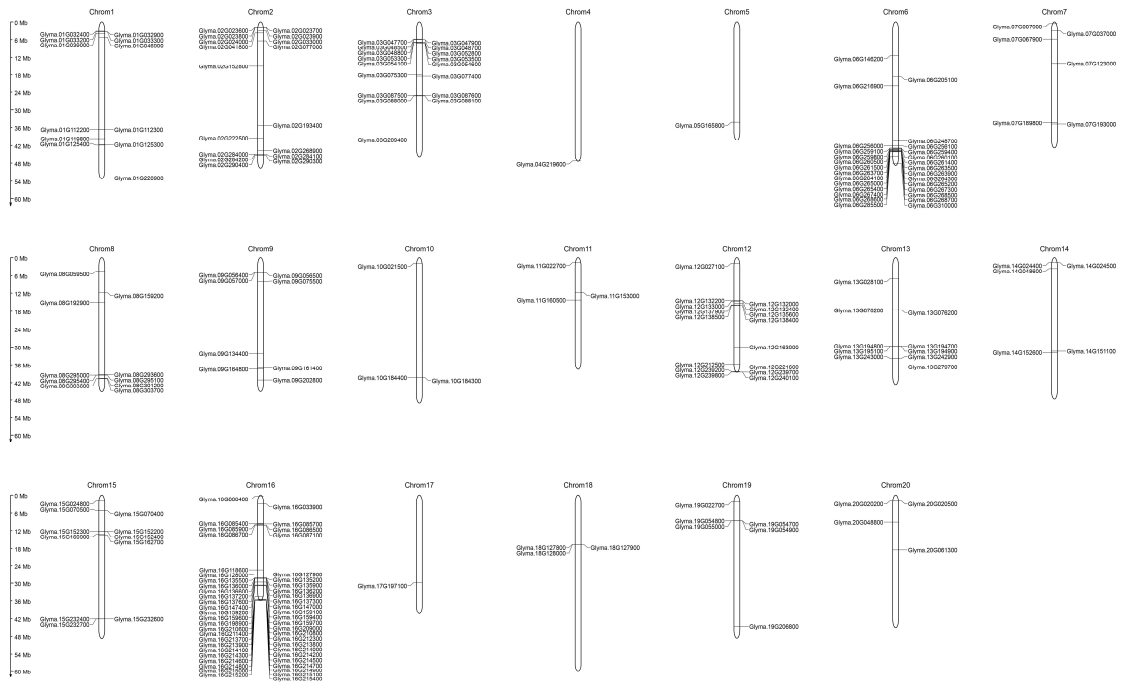

**Figure S1.** Chromosomal distribution of 210 *TNL-like* genes in soybean. The soybean genome consists of 20 pairs of chromosomes, and these 210 *TNL-like* genes are distributed on all 20 pairs of chromosomes in soybean. The left y-axis represents chromosome length, a cylindrical shape represents a chromosome, and the short lines connected to it represent the coding position of the gene. This image was drawn by the Mapgene2chrom website ([http://mg2c.iask.in/mg2c\\_v2.0/](http://mg2c.iask.in/mg2c_v2.0/)) (accessed on 18 December 2020).

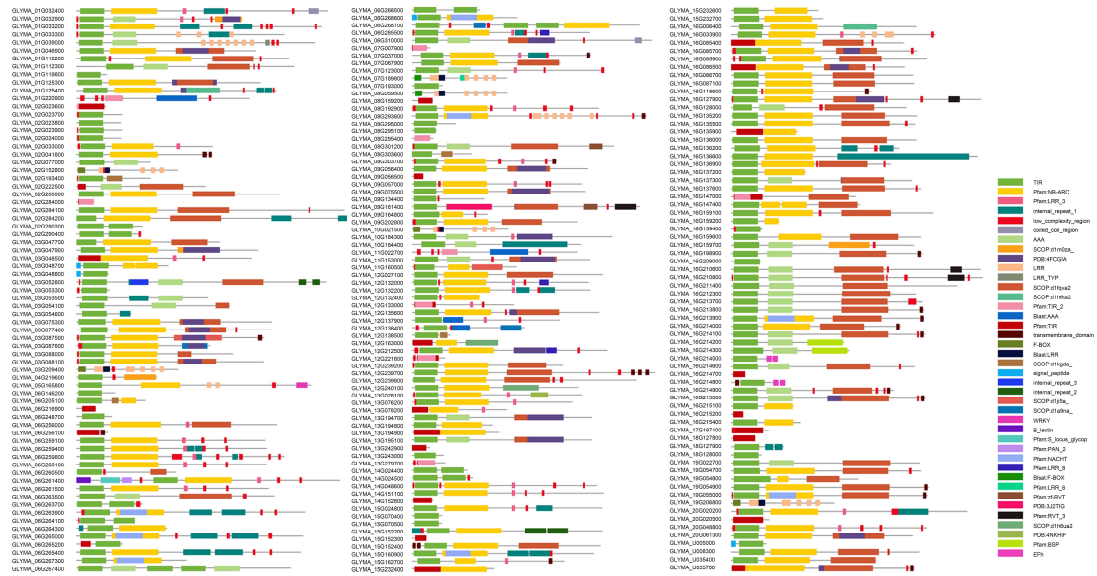

**Figure S2.** Structural domain prediction analysis of 210 TNL-like proteins in soybean. FASTA format corresponding to candidate genes was obtained from the NCBI database through gene number, and BATCH SMART in TBtools was used for domain predictions.

GLYMA\_01G032400

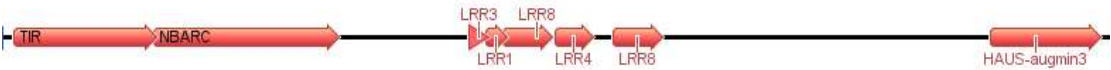

GLYMA\_01G032900

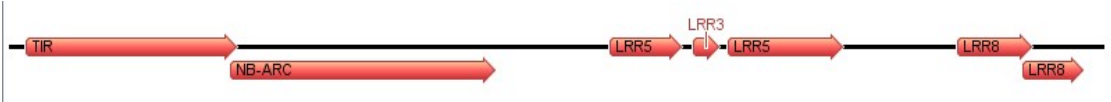

GLYMA\_01G033200

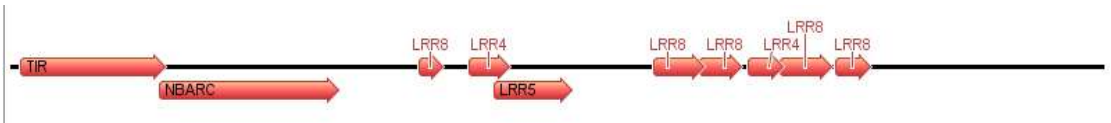

GLYMA\_01G033300

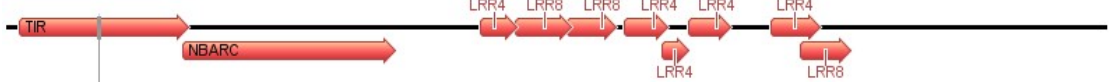

GLYMA\_01G039000

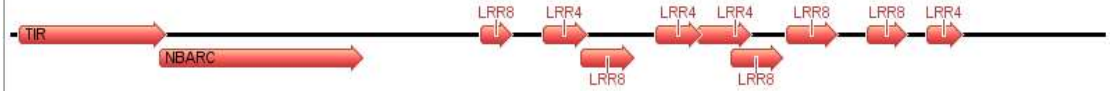

GLYMA\_01G046900

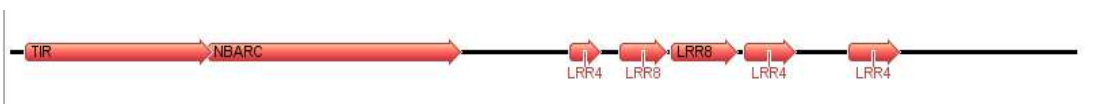

GLYMA\_01G112200

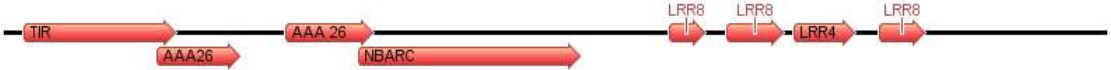

GLYMA\_01G112300

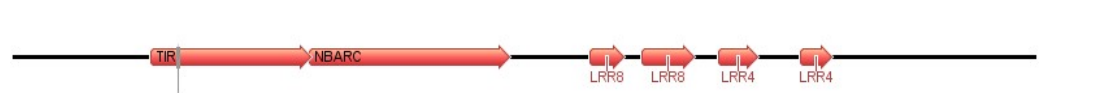

GLYMA\_01G119800

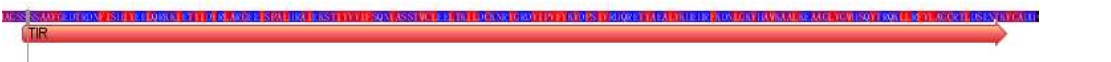

A schematic representation of the domain organization of the protein. A horizontal line represents the protein sequence, with three red arrows indicating domains: TIR, AAA 16, and AAA 22.

MSGLCAAATHTLSSQSLSTLT  
 TIR

The diagram illustrates a timeline with two main phases: TIR (Tumor Infiltration Response) and PRD (Post-Resection Disease). The TIR phase is represented by a red arrow pointing right, followed by a blue dashed line, and then a red arrow pointing right. The PRD phase is represented by a red arrow pointing right. The timeline is marked with a vertical line at the start of the TIR phase and another vertical line at the start of the PRD phase.



GLYMA\_02G041800

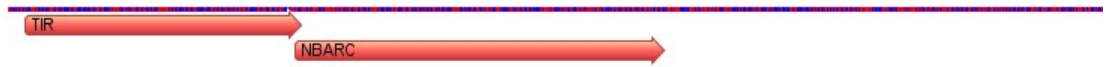

GLYMA\_02G077000

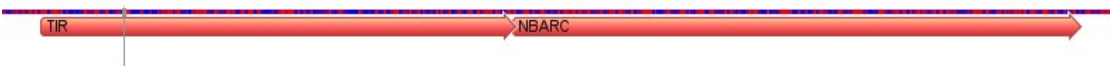

GLYMA\_02G193400

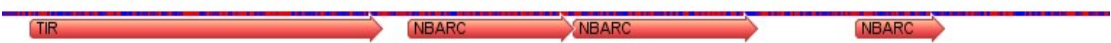

GLYMA\_02G222500

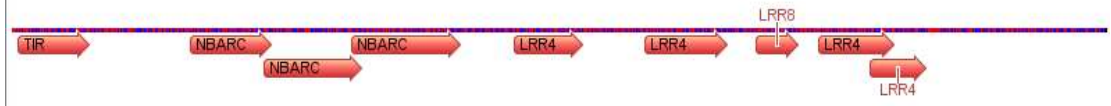

GLYMA\_02G268900

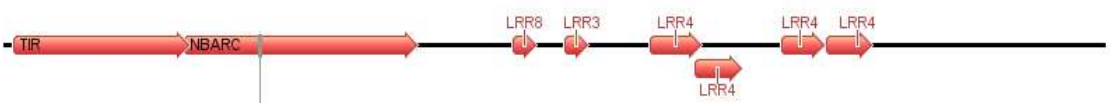

GLYMA\_02G284000

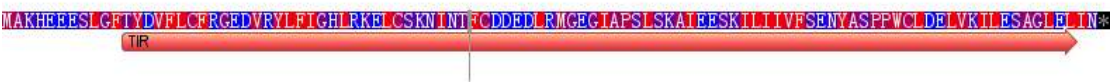

GLYMA\_02G284100

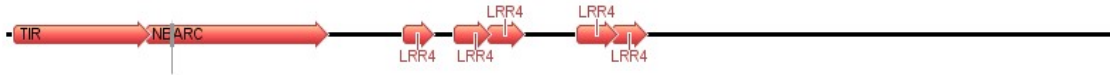

GLYMA\_02G284200

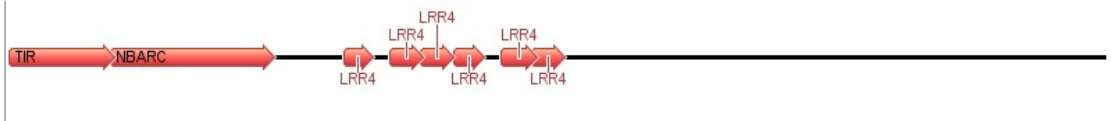

GLYMA\_02G290300

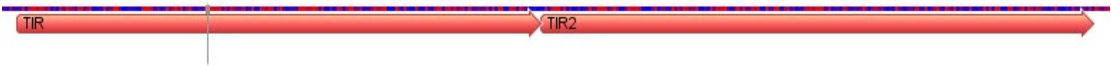

GLYMA\_02G290400

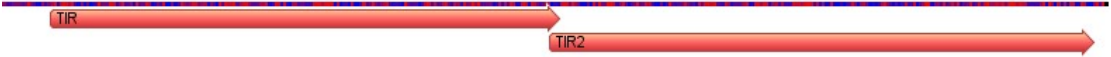

GLYMA\_03G047700

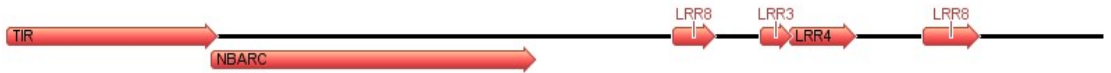

GLYMA\_03G047900

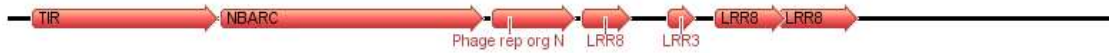

GLYMA\_03G048500

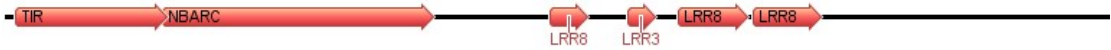

GLYMA\_03G048700

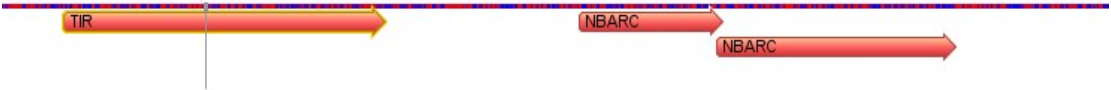

GLYMA\_03G048800

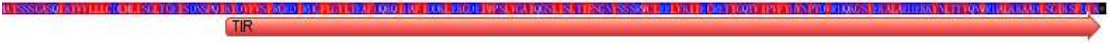

GLYMA\_03G052800

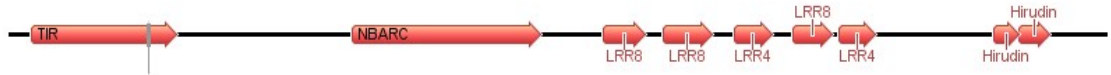

GLYMA\_03G053300

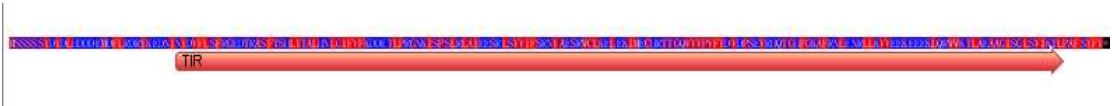

GLYMA\_03G053500

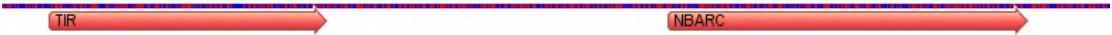

GLYMA\_03G054100

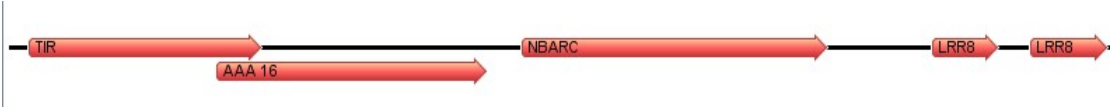

GLYMA\_03G054600

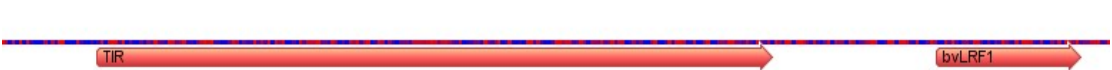

GLYMA\_03G075300

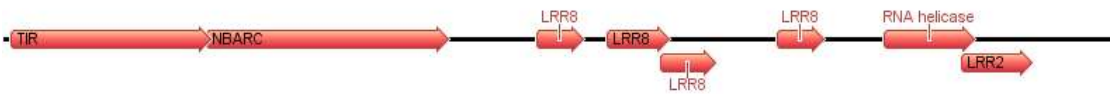

GLYMA\_03G077400

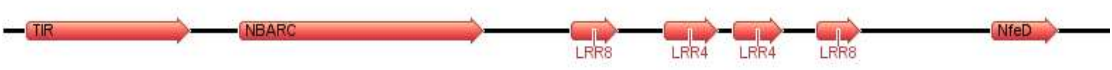

GLYMA\_03G087500

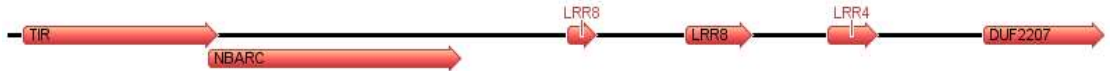

GLYMA\_03G087600

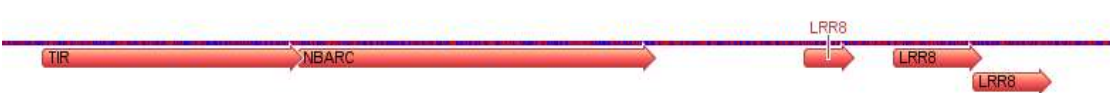

GLYMA\_03G088000

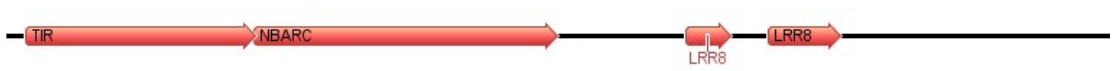

GLYMA\_03G088100

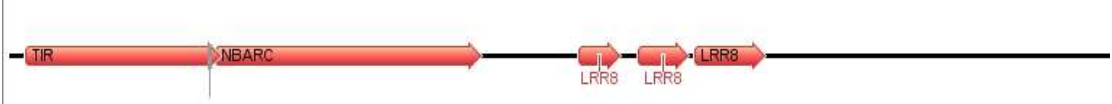

GLYMA\_04G219600

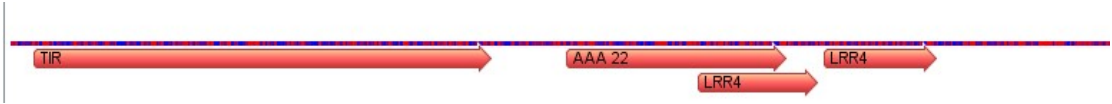

GLYMA\_05G165800

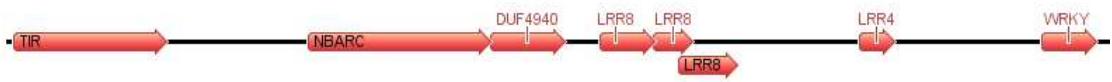

GLYMA\_06G146200

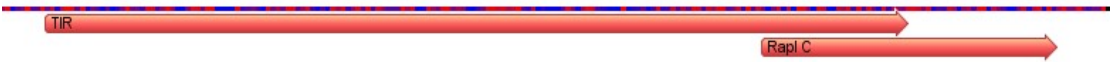

GLYMA\_06G205100

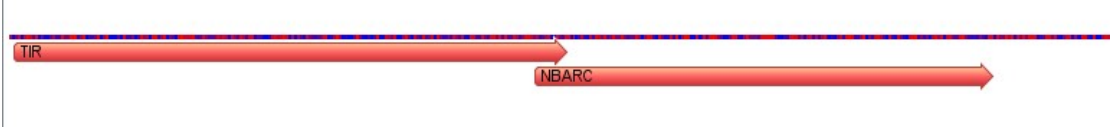

GLYMA\_06G2016900

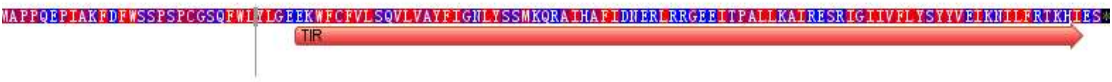

GLYMA\_06G248700

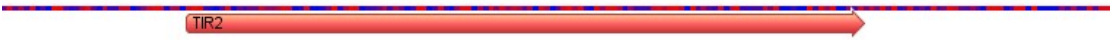

GLYMA\_06G256000

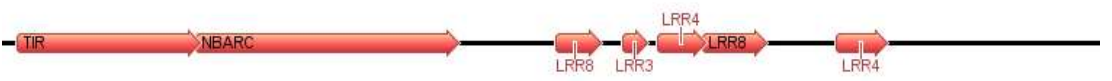

GLYMA\_06G256100

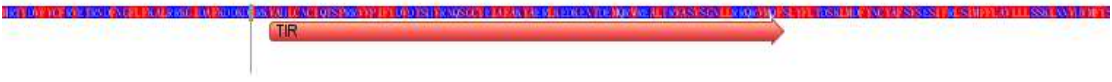

GLYMA\_06G259100

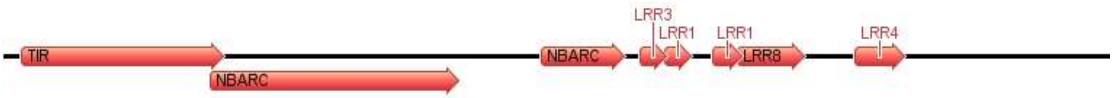

GLYMA\_06G259400

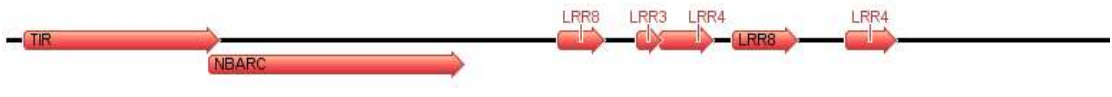

GLYMA\_06G259800

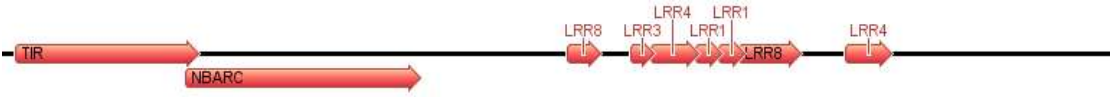

GLYMA\_06G260100

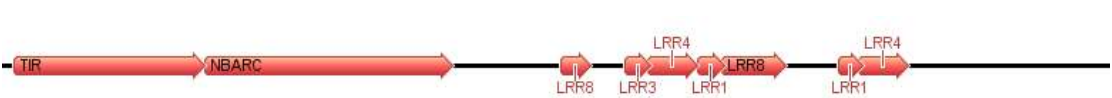

GLYMA\_06G260500

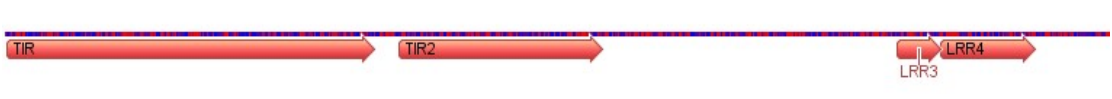

GLYMA\_06G261400

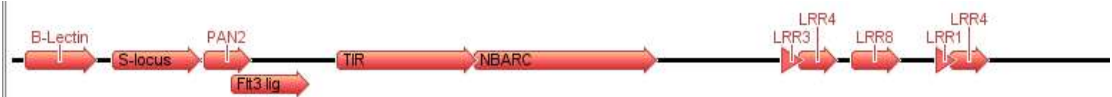

GLYMA\_06G261500

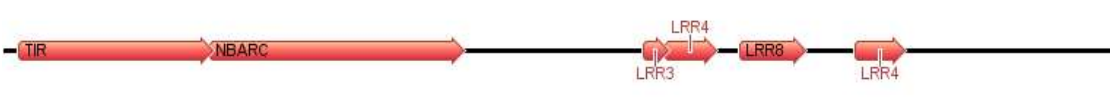

GLYMA\_06G263500

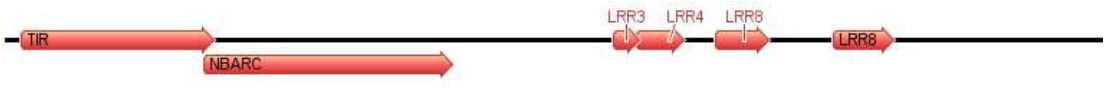

GLYMA\_06G263700

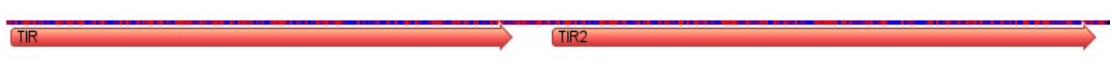

GLYMA\_06G263900

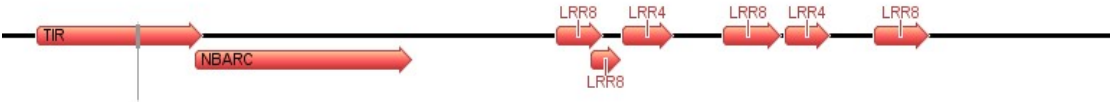

GLYMA\_06G264100

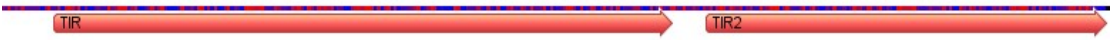

GLYMA\_06G264300

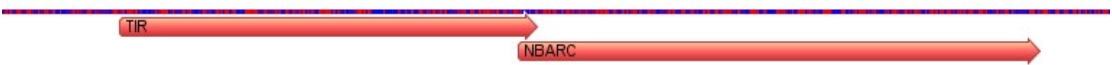

GLYMA\_06G265000

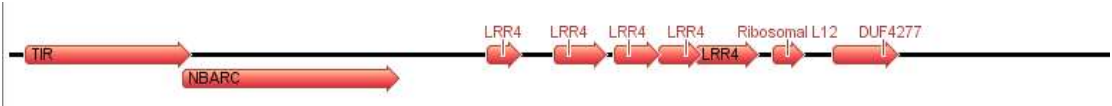

GLYMA\_06G265200

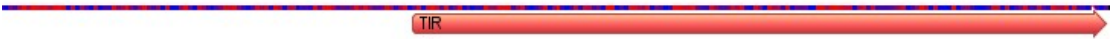

GLYMA\_06G265400

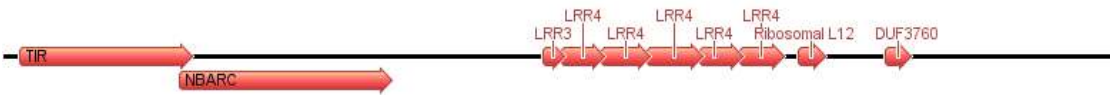

GLYMA\_06G267300

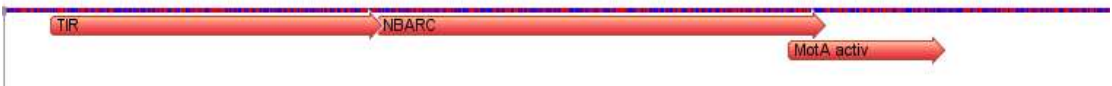

GLYMA\_06G267400

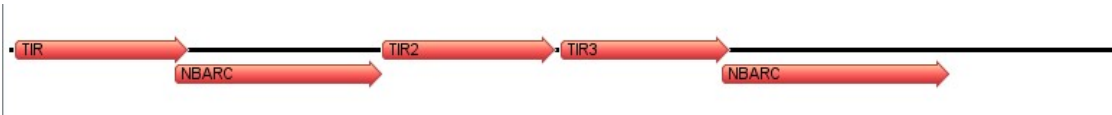

GLYMA\_06G268500

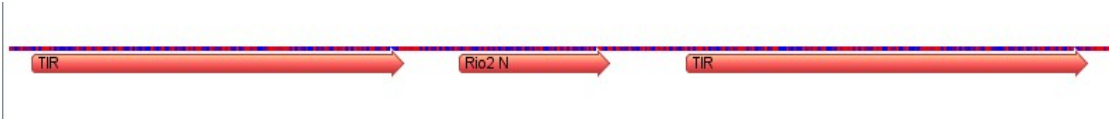

GLYMA\_06G268600

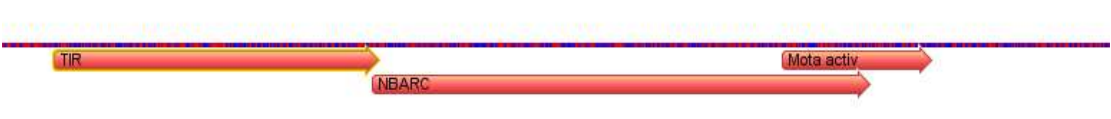

GLYMA\_06G268700

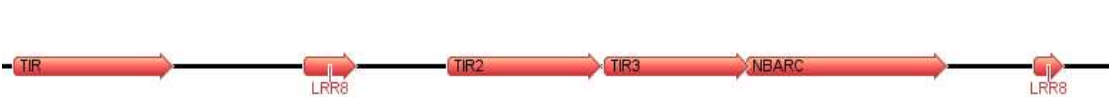

GLYMA\_06G285500

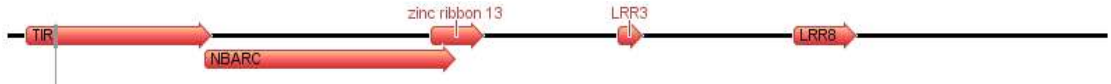

GLYMA\_06G310000

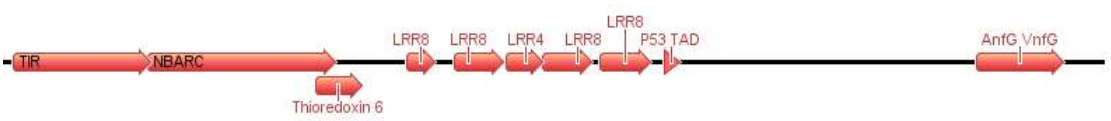

GLYMA\_07G007900

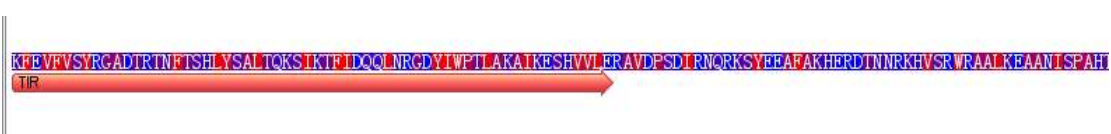

GLYMA\_07G037000

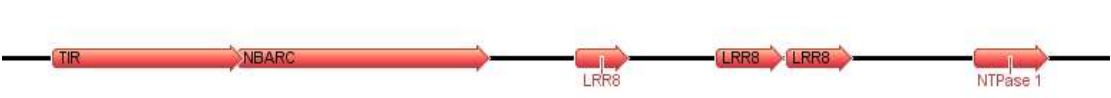

GLYMA\_07G067900

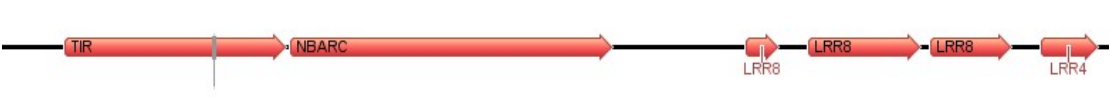

GLYMA\_07G123000

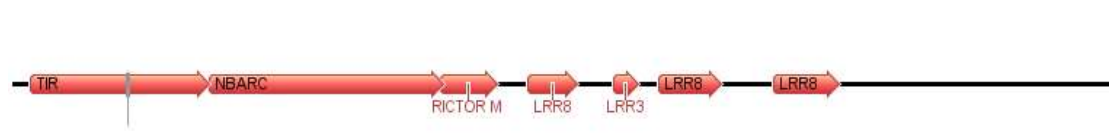



GLYMA\_07G193000

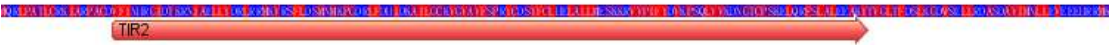

GLYMA\_08G159200

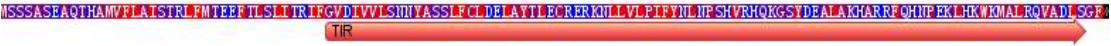

GLYMA\_08G192900

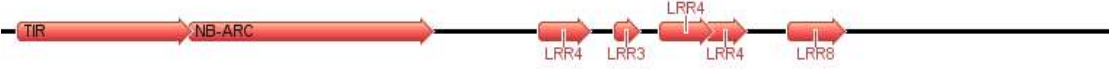

GLYMA\_08G293600

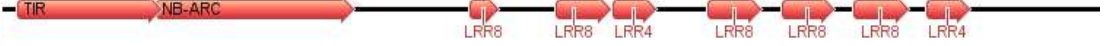

GLYMA\_08G295000

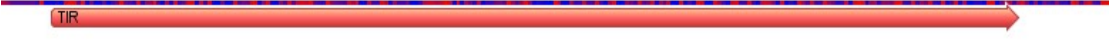

GLYMA\_08G295100

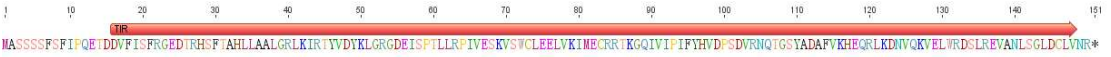

GLYMA\_08G295400

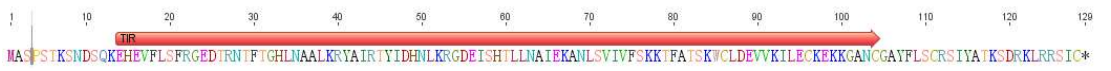

GLYMA\_08G301200

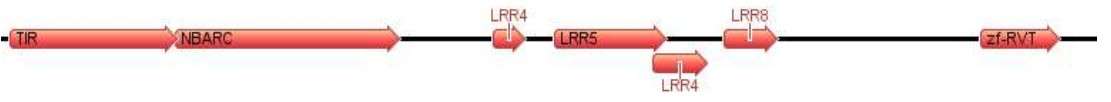

GLYMA\_08G303600

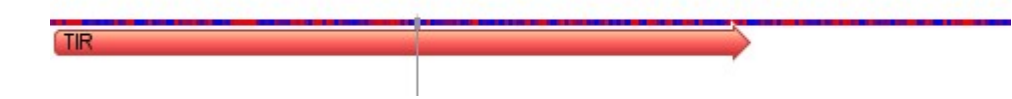



The diagram illustrates the domain architecture of the AtNLR1 gene. It features a TIR domain (Transmembrane Invariant Region) at the N-terminus, followed by an NB-ARC domain (Nucleotide-Binding and Arabinosyl-Cyclase domain). The LRR domain (Leucine-Rich Repeat domain) is located at the C-terminus and is composed of five LRRs: LRR8, LRR4, LRR3, LRR4, and LRR8. The LRR3 domain is highlighted in red, indicating its role in the study.

MSVNTTPKIKYDVFVSRGKIDRGFLSHLEAFKRNGINAYVDYKLERGEEIWPSTVQQLNDHSFR\*

The schematic diagram illustrates the domain architecture of the protein. It begins with a TIR domain, followed by an NB-ARC domain. The protein then contains a series of LRR domains: LRR8, LRR3, LRR8, LRR8, and LRR4. The LRR3 domain is shown with a mutation symbol (a vertical line with a horizontal bar) indicating a specific site of interest.

Schematic diagram of the LRR domain organization of the RVT-3 protein. The protein structure is shown as a linear sequence of domains: TIR, NBARC, LRR8, LRR4, DUF4435, LRR4, LRR4, ATPase 2, zf-RVT, and RVT-3. The LRR4 domain is highlighted in blue.

A horizontal timeline diagram with a red background. It features two red arrows pointing to the right. The first arrow is labeled 'TIR' and the second arrow is labeled 'NBARC'. A vertical line segment connects the end of the 'TIR' arrow to the start of the 'NBARC' arrow, indicating a transition or continuation of the process.

GLYMA\_10G184300

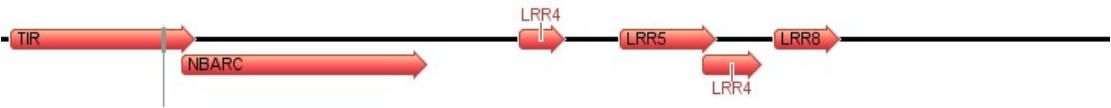

GLYMA\_10G184400

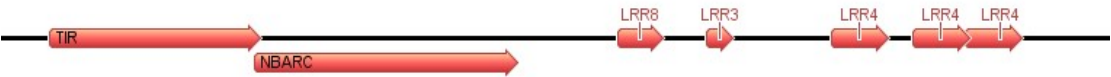

GLYMA\_11G022700

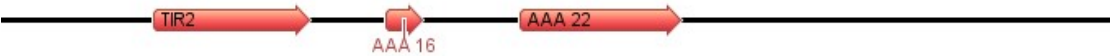

GLYMA\_11G153000

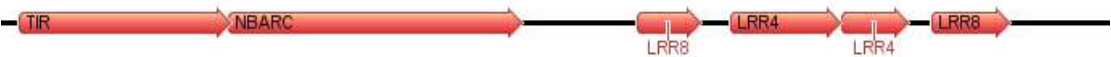

GLYMA\_11G160500

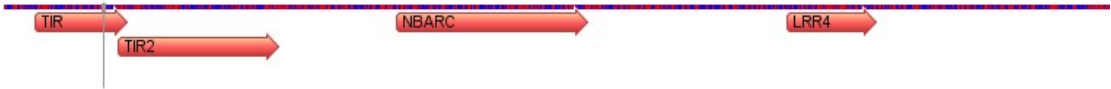

GLYMA\_12G027100

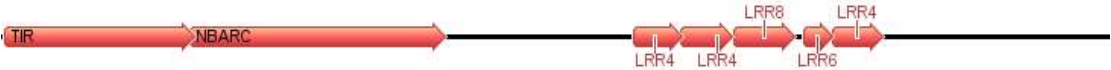

GLYMA\_12G132000

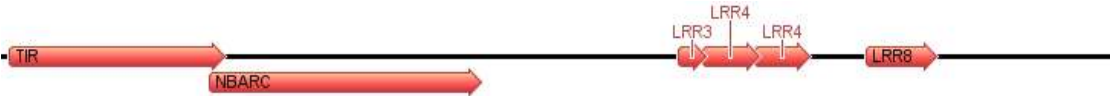

GLYMA\_12G132200

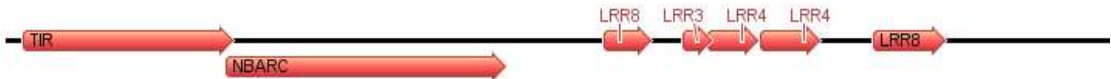

GLYMA\_12G132400

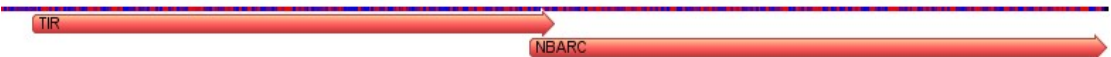

GLYMA\_12G133000

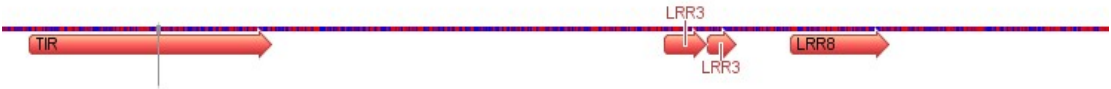

GLYMA\_12G135600

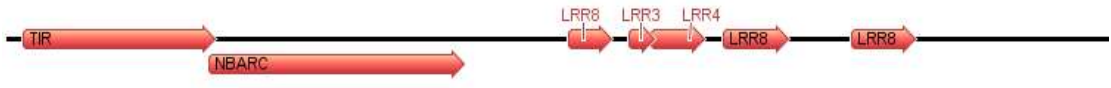

GLYMA\_12G137900

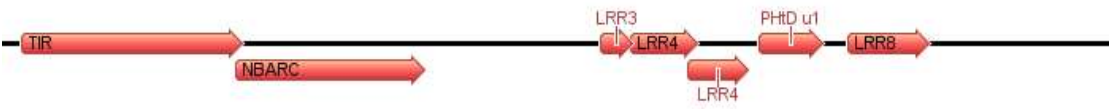

GLYMA\_12G138400

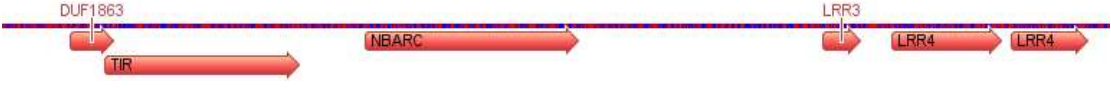

GLYMA\_12G138500

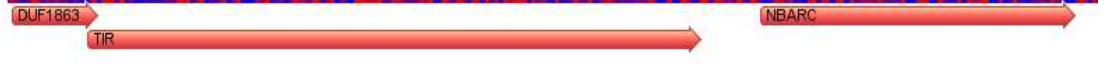

GLYMA\_12G163000

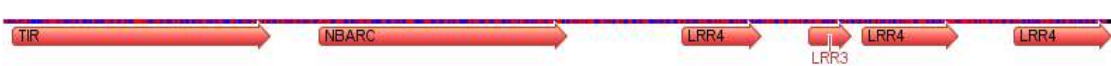

GLYMA\_12G212500

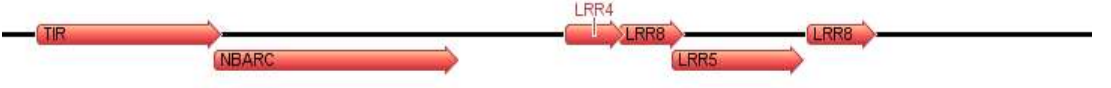

GLYMA\_12G221600

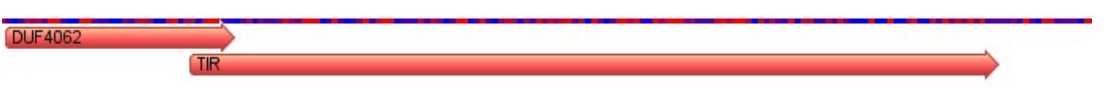

GLYMA\_12G239200

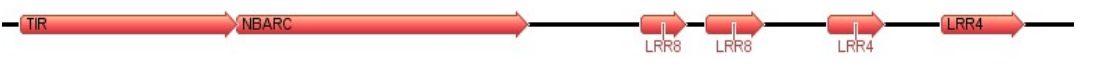

GLYMA\_12G239700

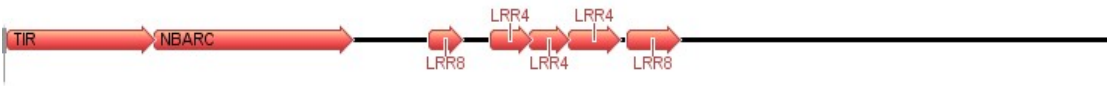

GLYMA\_12G239800

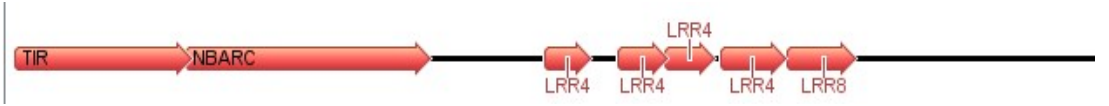

GLYMA\_12G240100

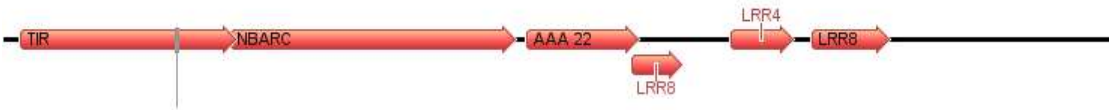

GLYMA\_13G028100

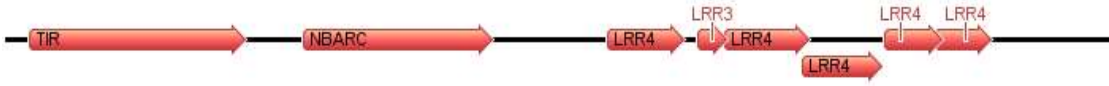

GLYMA\_13G076200

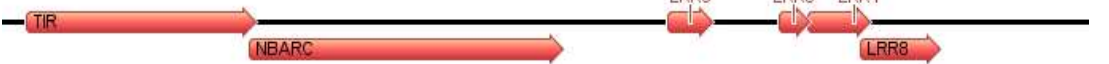

GLYMA\_13G078200

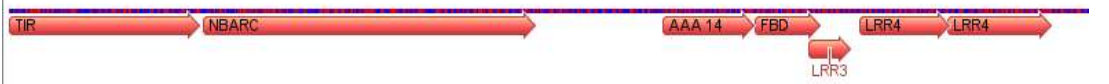

GLYMA\_13G194700

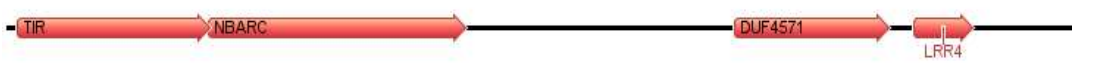

GLYMA\_13G194800

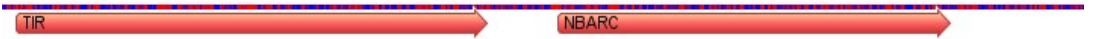

GLYMA\_13G194900

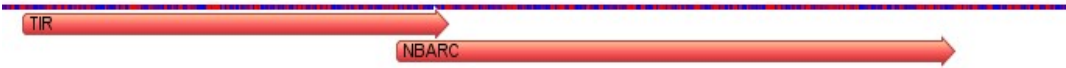

GLYMA\_13G195100

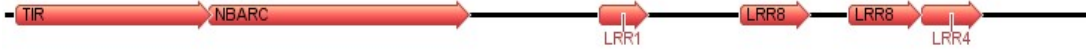

GLYMA\_13G242900

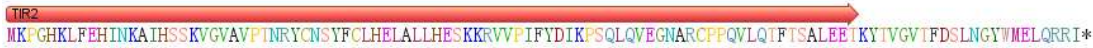

GLYMA\_13G243000

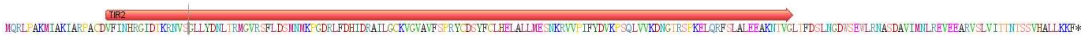

GLYMA\_13G279700

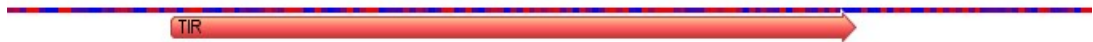

GLYMA\_14G024400

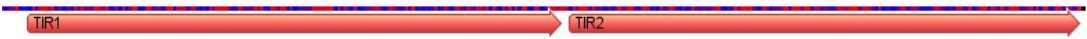

GLYMA\_14G024500

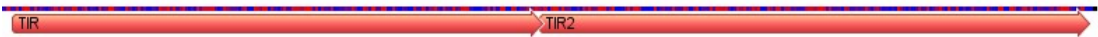

GLYMA\_14G048600

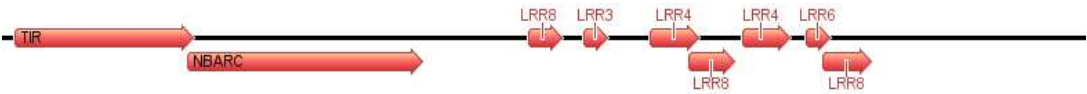

GLYMA\_14G151100

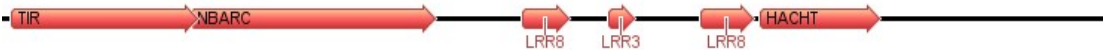

GLYMA\_14G152600

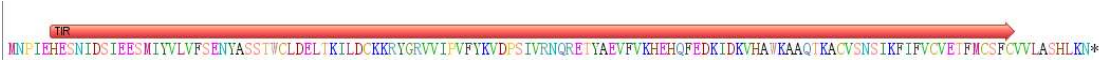

GLYMA\_15G024800

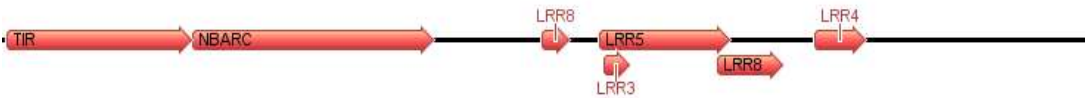

GLYMA\_15G070400

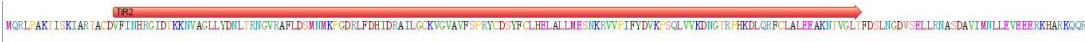

GLYMA\_15G070500

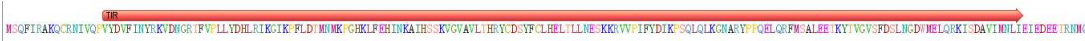

GLYMA\_15G152200

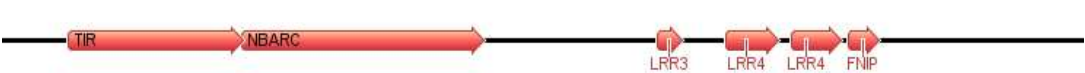

GLYMA\_15G152300

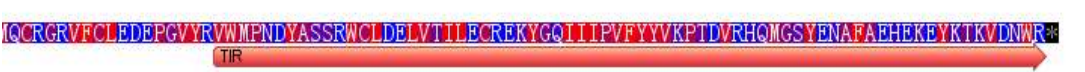

GLYMA\_15G152400

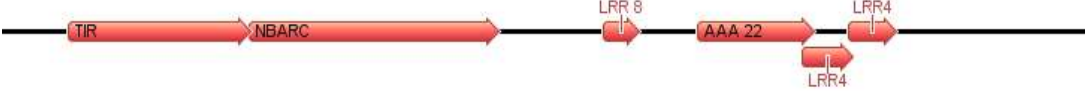

GLYMA\_15G160900

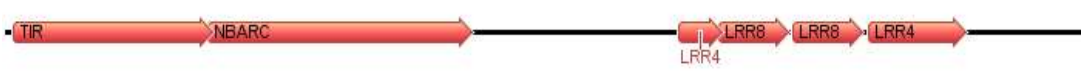

GLYMA\_15G162700

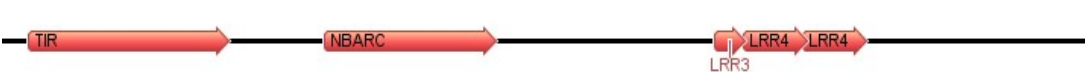

GLYMA\_15G232400

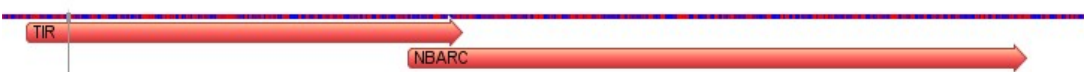

GLYMA\_15G232600

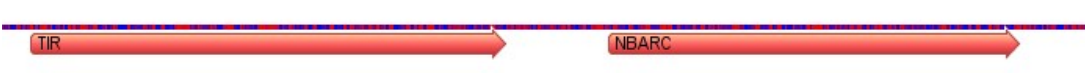

GLYMA\_15G232700

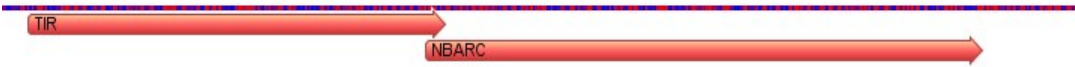

GLYMA\_16G006400

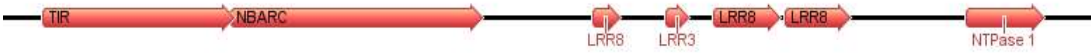

GLYMA\_16G033900

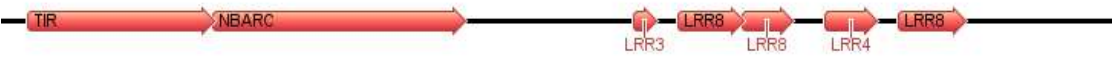

GLYMA\_16G085400

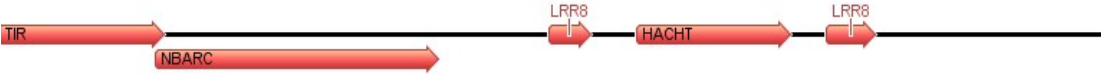

GLYMA\_16G085700

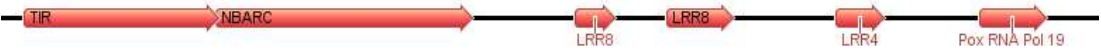

GLYMA\_16G085900

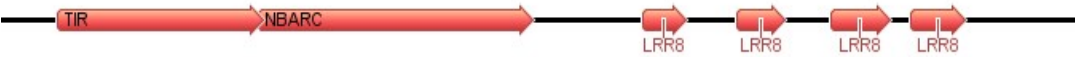

GLYMA\_16G086500

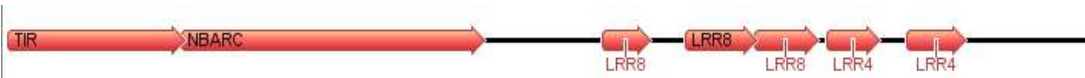

GLYMA\_16G086700

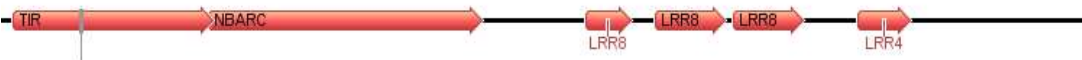

GLYMA\_16G087100

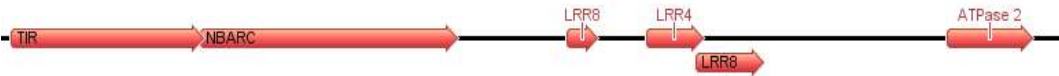



GLYMA\_16G118600

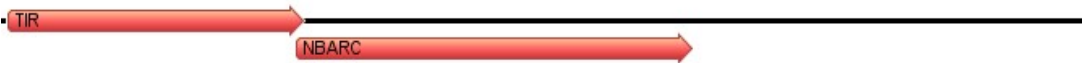

GLYMA\_16G127900

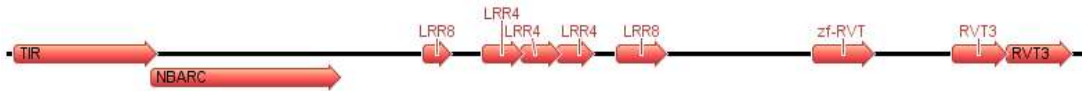

GLYMA\_16G128000

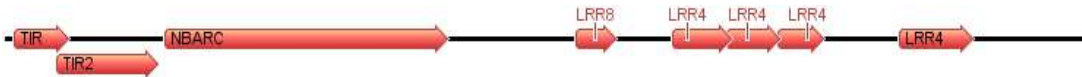

GLYMA\_16G135200

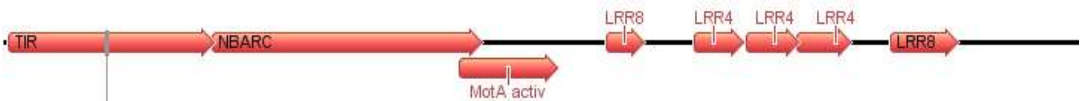

GLYMA\_16G135500

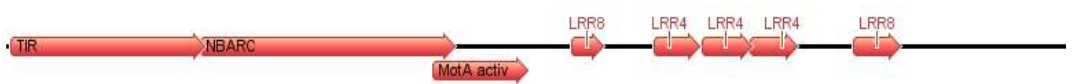

GLYMA\_16G135900

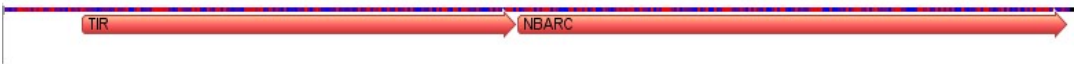

GLYMA\_16G136000

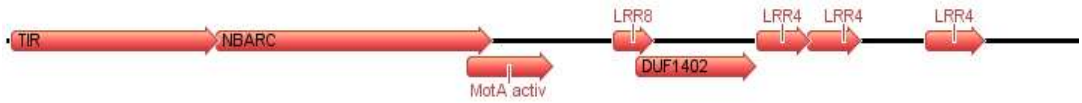

GLYMA\_16G136200

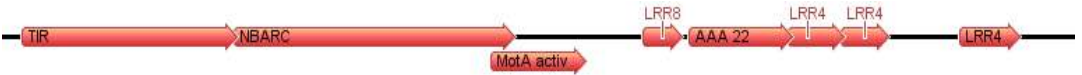

GLYMA\_16G136600

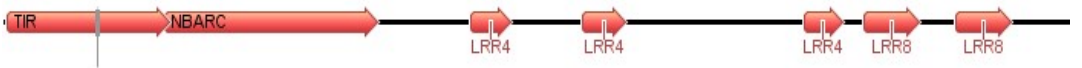

GLYMA\_16G136900

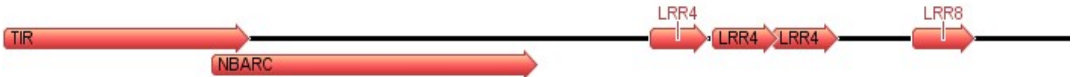



GLYMA\_16G137200

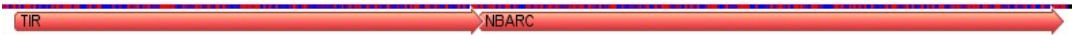

GLYMA\_16G137300

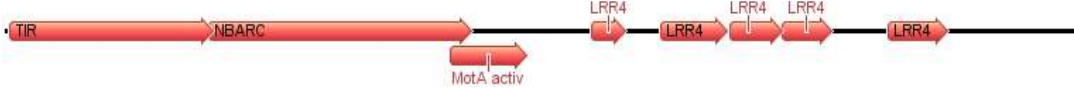

GLYMA\_16G137600

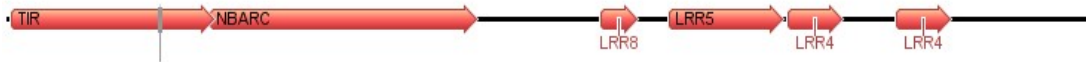

GLYMA\_16G147000

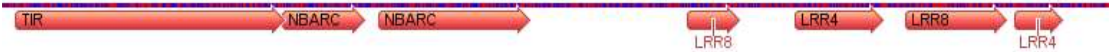

GLYMA\_16G147400

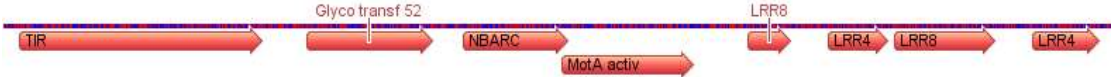

GLYMA\_16G159100

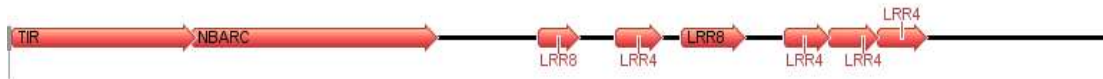

GLYMA\_16G159200

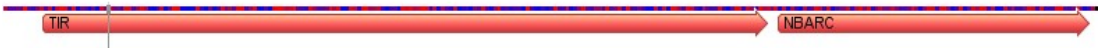

GLYMA\_16G159400

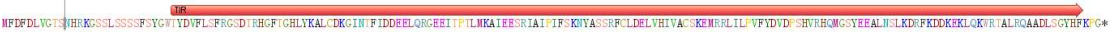

GLYMA\_16G159600

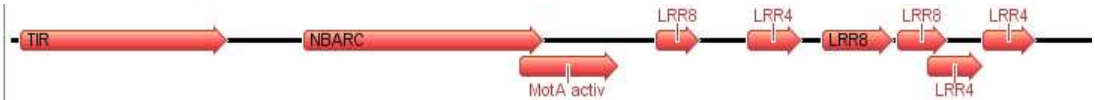

GLYMA\_16G159700

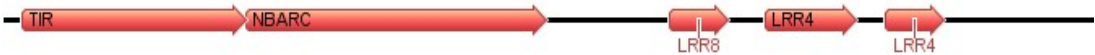

GLYMA\_16G198900

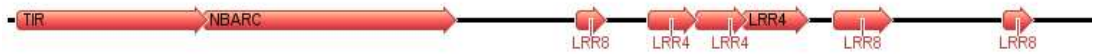

GLYMA\_16G209000

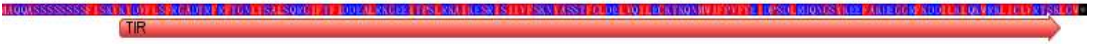

GLYMA\_16G210600

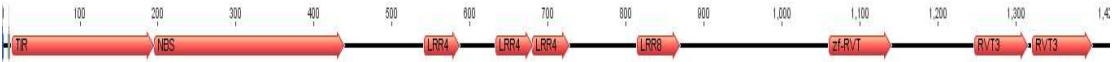

GLYMA\_16G210800

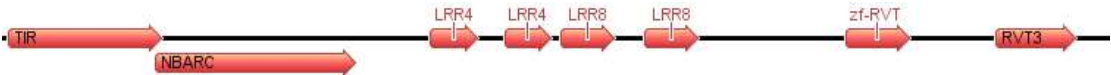

GLYMA\_16G211400

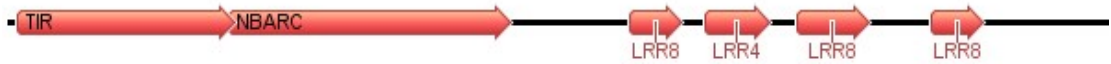

GLYMA\_16G212300

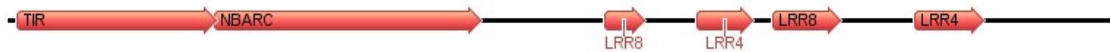

GLYMA\_16G213700

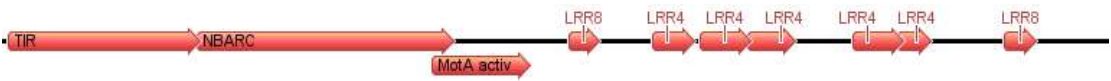

GLYMA\_16G213800

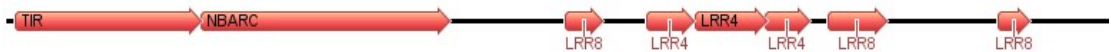

GLYMA\_16G213900

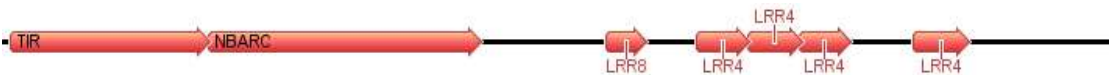

GLYMA\_16G214000

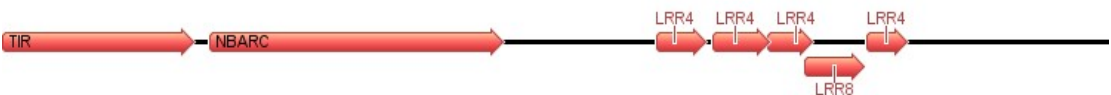

GLYMA\_16G214100

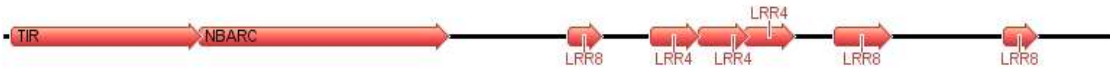

GLYMA\_16G214200

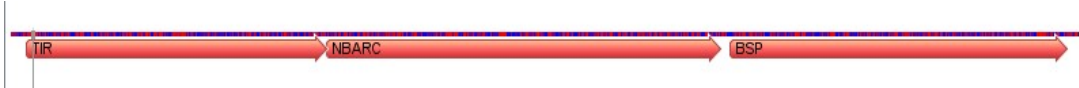

GLYMA\_16G214300

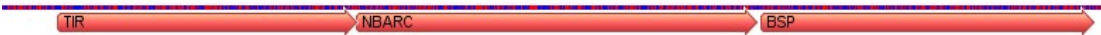

GLYMA\_16G214500

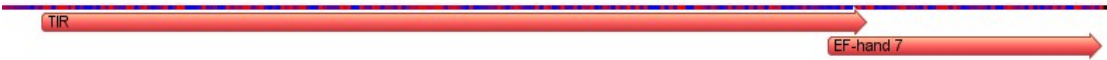

GLYMA\_16G214600

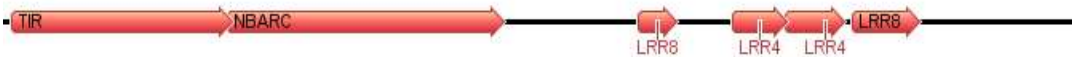

GLYMA\_16G214700

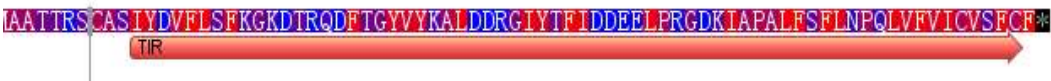

GLYMA\_16G214800

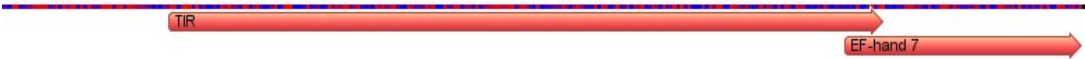

GLYMA\_16G214900

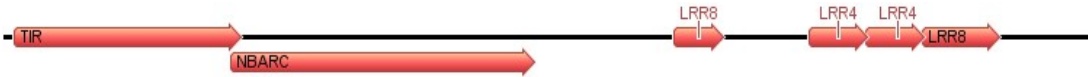

GLYMA\_16G215000

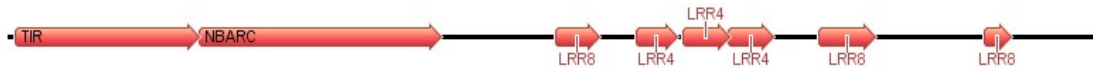

GLYMA\_16G215100

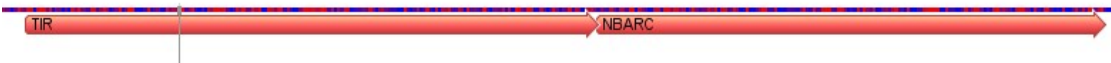

GLYMA\_16G215200

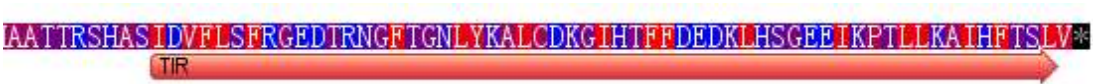

GLYMA\_16G215400

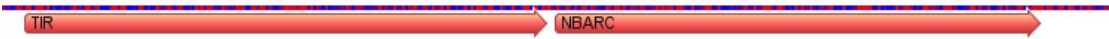

GLYMA\_17G197100

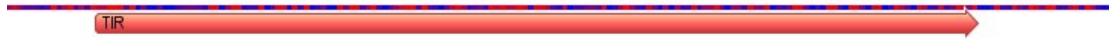

GLYMA\_18G127800

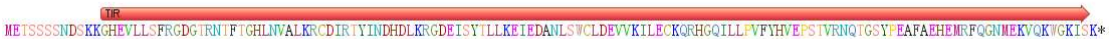

GLYMA\_18G127900

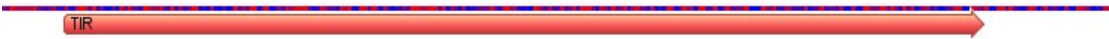

GLYMA\_18G128000

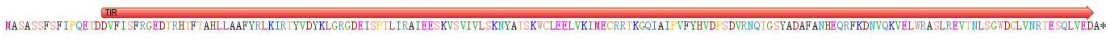

GLYMA\_19G022700

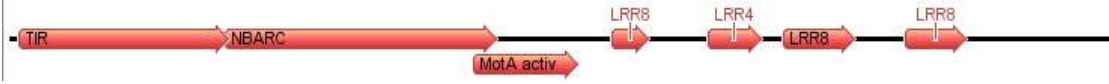

GLYMA\_19G054700

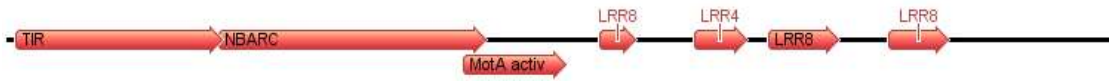

GLYMA\_19G054800

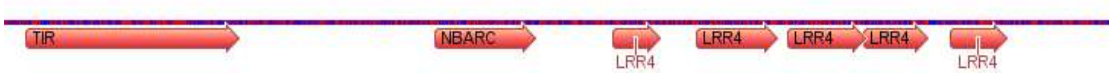

GLYMA\_19G054900

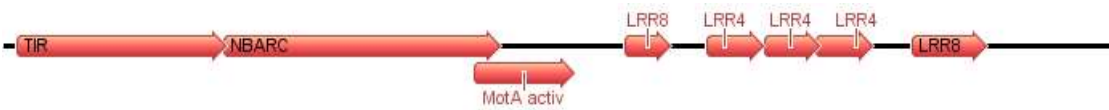

GLYMA\_19G055000

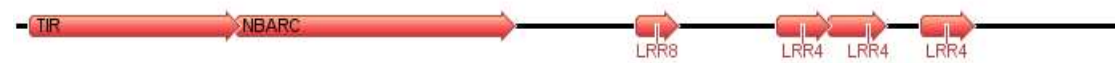

GLYMA\_20G020200

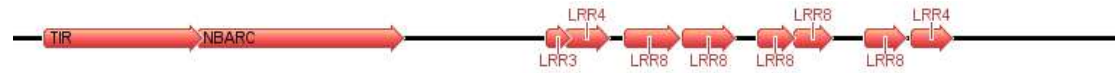

GLYMA\_20G020500

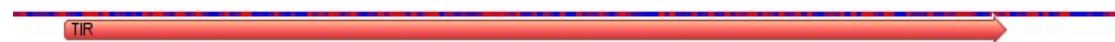

GLYMA\_20G048800

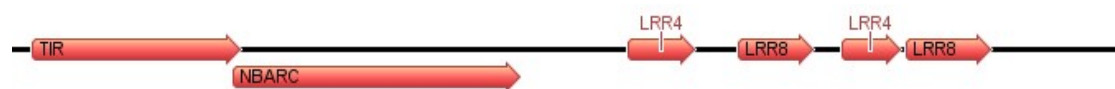

GLYMA\_20G061300

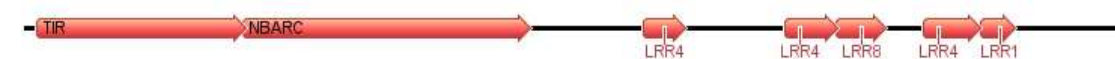

GLYMA\_U005000

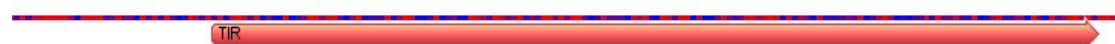

GLYMA\_U008300

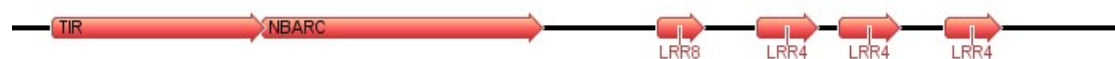

GLYMA\_U035400

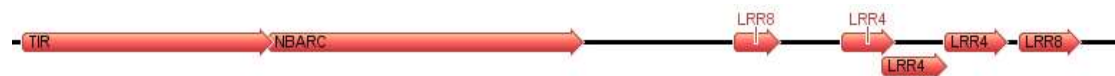

GLYMA\_U035700

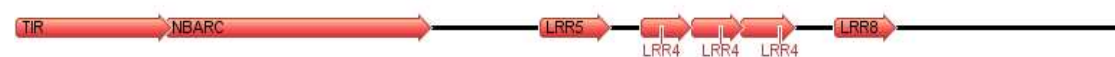

**Figure S3.** Domain diagram of 210 TNL-like proteins. Structural domain prediction and position calibration of the 210 TNL-like proteins using GENEIOUS v4.8.4 software based on PFAM database (<http://pfam-legacy.xfam.org/>) (accessed on 18 December 2020).

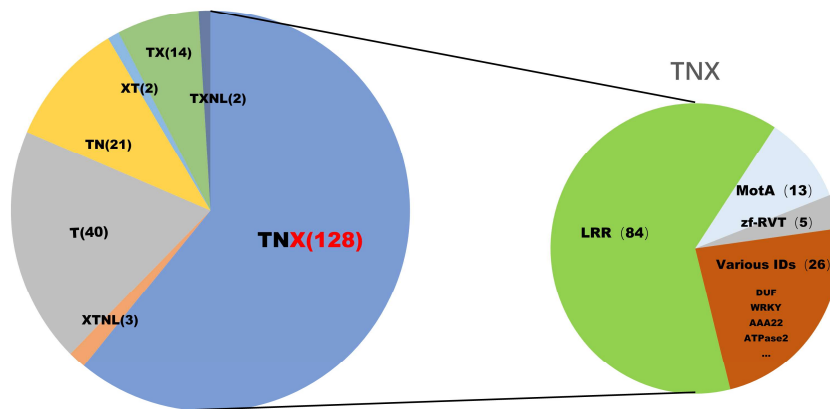

**Figure S4.** Classification of 210 soybean TNL-like proteins. The 210 soybean TNL-like proteins were grouped by domain type.

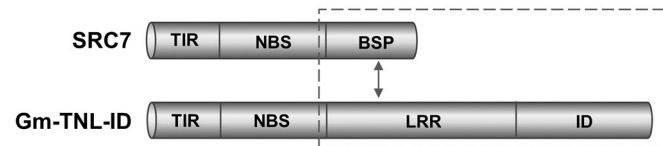

**Figure S5.** Domain architecture of SRC7 and soybean Gm-TNL-ID proteins. The above diagram shows the basic structural domains of SRC7 and the Gm-TNL-ID proteins we had screened.

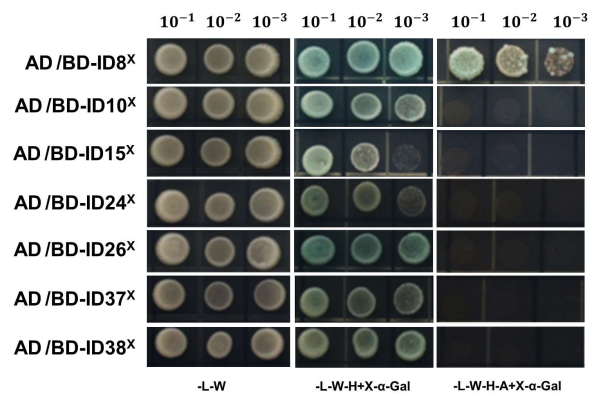

**Figure S6.** Evaluation of these BD-Gm-TNL-ID<sup>x</sup> bait vectors. The auto-activation activity of these BD-Gm-TNL-ID<sup>x</sup> were tested. The yeast cells containing indicated constructs were grown on different selective media, and 100 µl of X-α-Gal was added visualized the reporter expression. The yeast concentration gradients were 10<sup>-1</sup>, 10<sup>-2</sup> and 10<sup>-3</sup>, respectively.

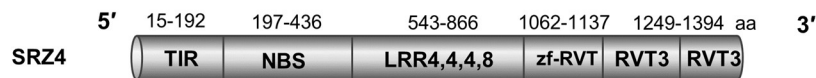

**Figure S7.** Domain architecture of SRZ4. Domain architecture of SRZ4. These grey boxes indicate TIR, NBS, LRR4, LRR4, LRR4, LRR8, zf-RVT, RVT3 and RVT3 domains, respectively.

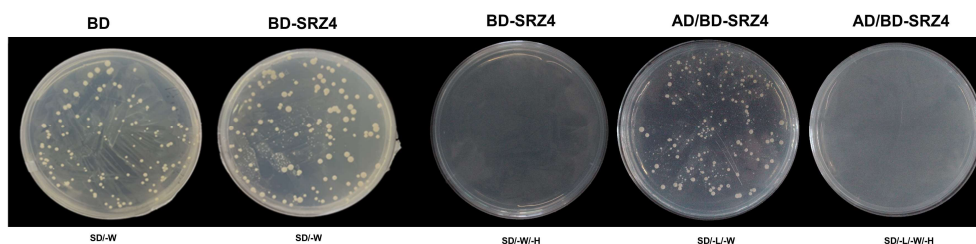

**Figure S8.** Testing the toxicity and auto-activation of SRZ4. For toxicity validation, the yeast cells containing BD-SRZ4 was grown on minimal media (SD/-W). For auto-activation activity validation, the yeast cells containing BD-SRZ4 and AD were grown on minimal media (SD/-L/-W) and stringent selective media (SD/-L/-W/-H).



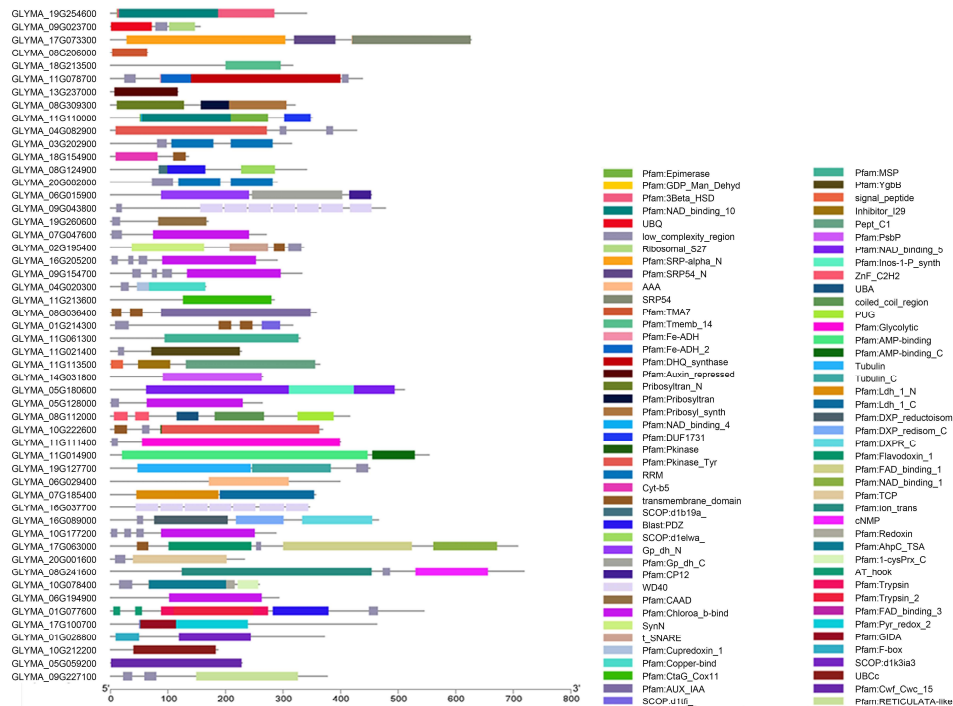

**Figure S9.** Structural domain prediction analysis of the soybean protein interacting with SRZ4. Schematic diagram of domain prediction for 48 soybean proteins interacting with SRZ4 using BATCH SMART in TBtools.
